# Supplementary material for: The on-and-off dynamics of thiophene on a nickel cluster enables efficient hydrodesulfurization and excellent stability at high temperatures
Source: Royal Society of Chemistry journal article supplement (doi:10.1039/c8nr09289c), 2019-01-01
Supplement: c8nr09289c1.pdf [file c8nr09289c1.pdf]

## Supporting Information

### **The On-and-Off Dynamics of Thiophene on a Nickel Cluster Enables Efficient Hydrodesulfurization and Excellent Stability at High Temperatures**

Xinglian Cheng,<sup>1</sup> Xiaoqi Chai,<sup>2</sup> Weigang Hu,<sup>1</sup> Shenggang Li,<sup>\*,2</sup> and Yan Zhu<sup>\*,1</sup>

<sup>1</sup>School of Chemistry and Chemical Engineering, Nanjing University, Nanjing  
210093, China

<sup>2</sup>Shanghai Advanced Research Institute, Chinese Academy of Sciences, Shanghai  
201210, China

**Supporting Figures and Tables:**

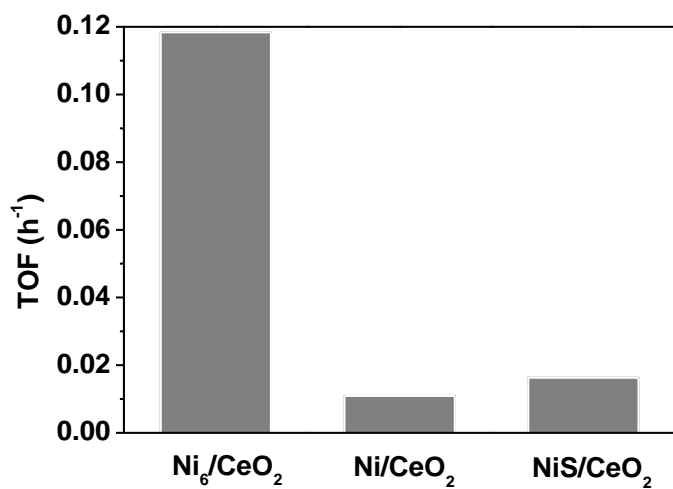

**Figure S1.** Comparison of catalytic hydrodesulfurization of thiophene over different catalysts. Reaction conditions: 100 mg catalyst, 0.15 % thiophene in hexane with 0.002 cm<sup>3</sup>/min flow, 14 bar H<sub>2</sub>, space velocity = 12000 cm<sup>3</sup>/g/h, room temperature = 400 °C.

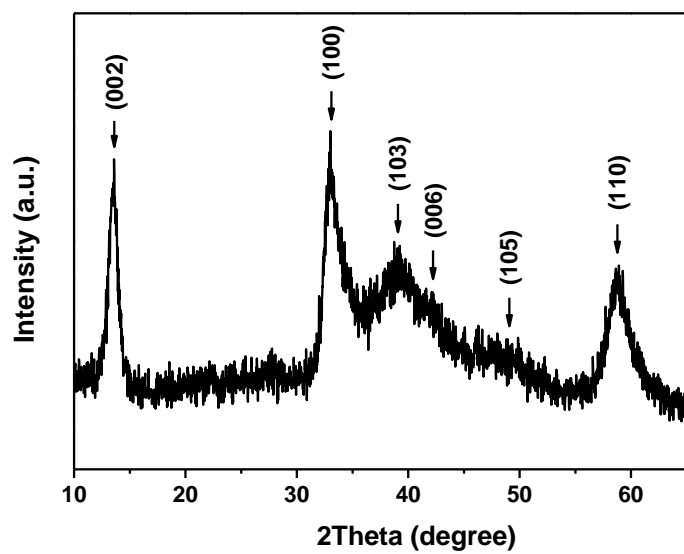

**Figure S2.** XRD pattern of MoS<sub>2</sub>.

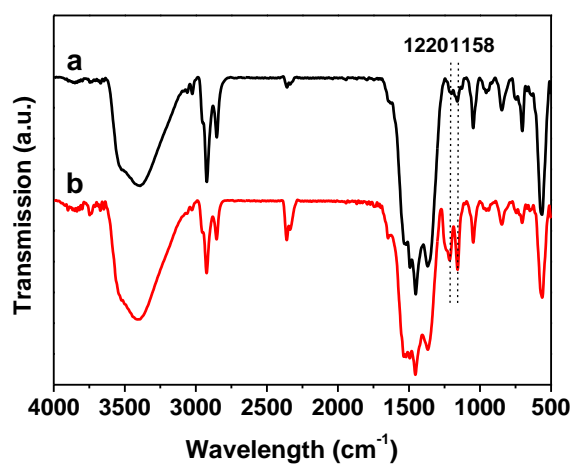

**Figure S3.** IR spectra of the pretreated Ni<sub>6</sub>(SR)<sub>12</sub>/CeO<sub>2</sub> (a) before and (b) after the adsorption of thiophene.

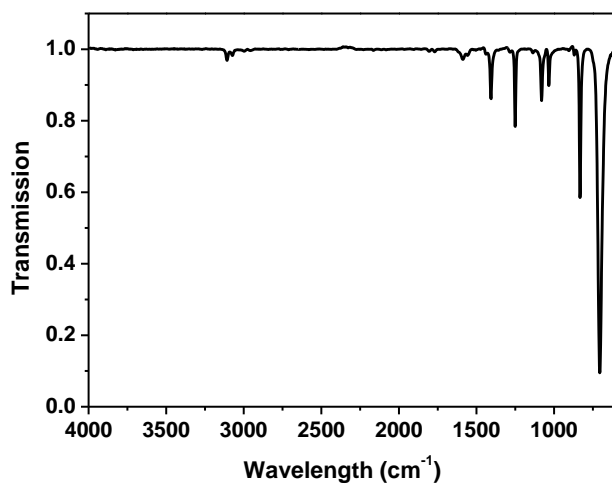

**Figure S4.** FT-IR spectrum of thiophene.

**Table S1.** The bond lengths of the Ni<sub>6</sub>(SC<sub>2</sub>H<sub>4</sub>Ph)<sub>12</sub> cluster.

| No. | Atom1 | Atom2 | Distance(Å) |
|-----|-------|-------|-------------|
| 1   | Ni1   | S6    | 2.1822(19)  |
| 2   | Ni1   | S1    | 2.1969(19)  |
| 3   | Ni1   | S7    | 2.2001(19)  |
| 4   | Ni1   | S9    | 2.2281(19)  |
| 5   | Ni1   | Ni2   | 2.8345(14)  |
| 6   | Ni1   | Ni3   | 2.9450(14)  |
| 7   | Ni2   | S5    | 2.192(2)    |
| 8   | Ni2   | S7    | 2.1931(19)  |
| 9   | Ni2   | S8    | 2.1961(19)  |
| 10  | Ni2   | S1    | 2.205(2)    |
| 11  | Ni3   | S8    | 2.1949(19)  |
| 12  | Ni3   | S5    | 2.198(2)    |
| 13  | Ni3   | S6    | 2.2046(19)  |
| 14  | Ni3   | S9    | 2.212(2)    |
| 15  | S1    | C23   | 1.822(6)    |
| 16  | S5    | C13   | 1.841(7)    |
| 17  | S5    | Ni3   | 2.198(2)    |
| 18  | S6    | C5    | 1.829(7)    |
| 19  | S7    | C1    | 1.817(7)    |
| 20  | S8    | C2    | 1.829(7)    |
| 21  | S8    | Ni3   | 2.1948(19)  |
| 22  | S9    | C16   | 1.836(6)    |
| 23  | C1    | C26   | 1.525(9)    |
| 24  | C1    | H1A   | 0.97        |
| 25  | C1    | H1B   | 0.97        |
| 26  | C2    | C9    | 1.512(9)    |
| 27  | C2    | H2A   | 0.97        |
| 28  | C2    | H2B   | 0.97        |
| 29  | C3    | C11   | 1.373(10)   |
| 30  | C3    | C27   | 1.383(10)   |
| 31  | C3    | C4    | 1.515(10)   |
| 32  | C4    | C5    | 1.535(9)    |
| 33  | C4    | H4A   | 0.97        |
| 34  | C4    | H4B   | 0.97        |
| 35  | C5    | H5A   | 0.97        |
| 36  | C5    | H5B   | 0.97        |
| 37  | C6    | C15   | 1.500(10)   |
| 38  | C6    | C16   | 1.520(9)    |
| 39  | C6    | H6A   | 0.97        |
| 40  | C6    | H6B   | 0.97        |

|    |     |      |           |
|----|-----|------|-----------|
| 41 | C7  | C30  | 1.371(8)  |
| 42 | C7  | C20  | 1.379(8)  |
| 43 | C7  | C9   | 1.510(9)  |
| 44 | C8  | C10  | 1.374(9)  |
| 45 | C8  | C22  | 1.392(10) |
| 46 | C8  | H8A  | 0.93      |
| 47 | C9  | H9A  | 0.97      |
| 48 | C9  | H9B  | 0.97      |
| 49 | C10 | C29  | 1.385(9)  |
| 50 | C10 | C26  | 1.495(9)  |
| 51 | C11 | C21  | 1.387(10) |
| 52 | C11 | H11A | 0.93      |
| 53 | C12 | C13  | 1.513(9)  |
| 54 | C12 | C25  | 1.521(9)  |
| 55 | C12 | H12A | 0.97      |
| 56 | C12 | H12B | 0.97      |
| 57 | C13 | H13A | 0.97      |
| 58 | C13 | H13B | 0.97      |
| 59 | C14 | C24  | 1.344(11) |
| 60 | C14 | C22  | 1.379(11) |
| 61 | C14 | H14A | 0.93      |
| 62 | C15 | C32  | 1.352(11) |
| 63 | C15 | C33  | 1.388(10) |
| 64 | C16 | H16A | 0.97      |
| 65 | C16 | H16B | 0.97      |
| 66 | C17 | C31  | 1.365(9)  |
| 67 | C17 | C44  | 1.376(9)  |
| 68 | C17 | C18  | 1.511(10) |
| 69 | C18 | C23  | 1.508(9)  |
| 70 | C18 | H18A | 0.97      |
| 71 | C18 | H18B | 0.97      |
| 72 | C19 | C35  | 1.362(8)  |
| 73 | C19 | C20  | 1.366(8)  |
| 74 | C19 | H19A | 0.93      |
| 75 | C20 | H20A | 0.93      |
| 76 | C21 | C34  | 1.364(12) |
| 77 | C21 | H21A | 0.93      |
| 78 | C22 | H22A | 0.93      |
| 79 | C23 | H23A | 0.97      |
| 80 | C23 | H23B | 0.97      |
| 81 | C24 | C29  | 1.368(10) |
| 82 | C24 | H24A | 0.93      |
| 83 | C25 | C38  | 1.370(10) |

|     |     |      |           |
|-----|-----|------|-----------|
| 84  | C25 | C42  | 1.373(9)  |
| 85  | C26 | H26A | 0.97      |
| 86  | C26 | H26B | 0.97      |
| 87  | C27 | C47  | 1.381(12) |
| 88  | C27 | H27A | 0.93      |
| 89  | C29 | H29A | 0.93      |
| 90  | C30 | C43  | 1.369(8)  |
| 91  | C30 | H30A | 0.93      |
| 92  | C31 | C49  | 1.378(9)  |
| 93  | C31 | H31A | 0.93      |
| 94  | C32 | C36  | 1.387(12) |
| 95  | C32 | H32A | 0.93      |
| 96  | C33 | C46  | 1.387(13) |
| 97  | C33 | H33A | 0.93      |
| 98  | C34 | C47  | 1.370(13) |
| 99  | C34 | H34A | 0.93      |
| 100 | C35 | C43  | 1.368(9)  |
| 101 | C35 | H35A | 0.93      |
| 102 | C36 | C37  | 1.350(14) |
| 103 | C36 | H36A | 0.93      |
| 104 | C37 | C46  | 1.353(15) |
| 105 | C37 | H37A | 0.93      |
| 106 | C38 | C39  | 1.382(12) |
| 107 | C38 | H38A | 0.93      |
| 108 | C39 | C40  | 1.360(12) |
| 109 | C39 | H39A | 0.93      |
| 110 | C40 | C41  | 1.362(11) |
| 111 | C40 | H40A | 0.93      |
| 112 | C41 | C42  | 1.382(10) |
| 113 | C41 | H41A | 0.93      |
| 114 | C42 | H42A | 0.93      |
| 115 | C43 | H43A | 0.93      |
| 116 | C44 | C45  | 1.367(10) |
| 117 | C44 | H44A | 0.93      |
| 118 | C45 | C48  | 1.359(11) |
| 119 | C45 | H45A | 0.93      |
| 120 | C46 | H46A | 0.93      |
| 121 | C47 | H47A | 0.93      |
| 122 | C48 | C49  | 1.365(11) |
| 123 | C48 | H48A | 0.93      |
| 124 | C49 | H49A | 0.93      |

**Table S2.** Cartesian coordinates in Angstroms for the stationary states in Figure 5.  
Figure 5A.

$\text{Ni}_6(\text{SCH}_2\text{CH}_2\text{Ph})_{12}$ ,  $E_0 = -9520.372618$ ,  $G_{298} = -9520.549698$

|    |           |           |           |
|----|-----------|-----------|-----------|
| Ni | 2.178369  | -1.803948 | 0.892011  |
| Ni | 2.498248  | 1.081191  | 0.737589  |
| Ni | -0.358999 | -2.919051 | 0.155309  |
| S  | 2.394301  | -0.282202 | 2.486366  |
| S  | 2.231128  | 2.255957  | -1.118313 |
| S  | 0.849413  | -3.187909 | 1.99049   |
| S  | 3.698704  | -0.565772 | -0.130207 |
| S  | 1.614161  | 2.884796  | 1.663761  |
| S  | 1.61402   | -3.077905 | -0.837814 |
| C  | 3.597159  | -0.669469 | -1.965628 |
| H  | 2.54336   | -0.772722 | -2.261448 |
| H  | 3.972558  | 0.28878   | -2.355734 |
| C  | 0.678264  | 2.519022  | 3.2053    |
| H  | -0.074628 | 3.313951  | 3.308207  |
| H  | 0.166988  | 1.553162  | 3.085473  |
| C  | -1.745762 | -2.831377 | 5.212795  |
| C  | -0.909138 | -3.459772 | 4.116298  |
| H  | -1.577163 | -3.853013 | 3.330451  |
| H  | -0.340247 | -4.313752 | 4.516105  |
| C  | 0.063611  | -2.453995 | 3.482553  |
| H  | 0.879063  | -2.204334 | 4.176127  |
| H  | -0.456076 | -1.530702 | 3.191388  |
| C  | 1.245105  | -5.858306 | -0.897513 |
| H  | 1.68994   | -6.843383 | -0.656379 |
| H  | 0.330555  | -5.765341 | -0.28788  |
| C  | 0.952479  | 2.016361  | 5.675719  |
| C  | 5.417986  | -1.882884 | -4.844402 |
| H  | 6.400062  | -1.6576   | -4.415962 |
| C  | 1.628806  | 2.505539  | 4.410375  |
| H  | 2.030009  | 3.519568  | 4.563817  |
| H  | 2.483663  | 1.847411  | 4.175623  |
| C  | 4.302969  | -2.006809 | -3.991762 |
| C  | -2.611744 | -1.756979 | 4.917206  |
| H  | -2.660009 | -1.379337 | 3.89178   |
| C  | 4.886907  | 3.109274  | -1.159647 |
| H  | 4.985464  | 2.680342  | -2.170909 |
| H  | 5.068603  | 2.297689  | -0.434454 |
| C  | 3.45463   | 3.631178  | -0.959631 |
| H  | 3.200335  | 4.381897  | -1.726321 |



|   |           |           |           |
|---|-----------|-----------|-----------|
| H | 3.340499  | 4.094977  | 0.032375  |
| C | 4.021817  | -2.330477 | -6.791168 |
| H | 3.909237  | -2.445761 | -7.87302  |
| C | 0.86582   | -5.833142 | -2.365376 |
| C | 2.230832  | -4.779408 | -0.442449 |
| H | 3.210324  | -4.870425 | -0.940438 |
| H | 2.391973  | -4.849003 | 0.643368  |
| C | 3.573413  | -2.467582 | 4.614196  |
| C | 4.449065  | -1.903433 | 3.512227  |
| H | 5.506207  | -1.934122 | 3.840689  |
| H | 4.372774  | -2.554438 | 2.624409  |
| C | -0.226584 | 0.254256  | 6.901029  |
| H | -0.678204 | -0.740375 | 6.912036  |
| C | 0.37919   | 0.728828  | 5.728826  |
| H | 0.420142  | 0.084961  | 4.846276  |
| C | -3.403828 | -1.16949  | 5.913186  |
| H | -4.049751 | -0.323471 | 5.667221  |
| C | 5.281859  | -2.04823  | -6.235236 |
| H | 6.15835   | -1.949753 | -6.882798 |
| C | 4.143354  | -0.469786 | 3.072727  |
| H | 4.816693  | -0.175774 | 2.254615  |
| H | 4.268802  | 0.255405  | 3.893709  |
| C | 2.9024    | -2.451622 | -5.949389 |
| H | 1.915563  | -2.654787 | -6.372391 |
| C | 5.888331  | 4.225923  | -0.967896 |
| C | 4.440354  | -1.840139 | -2.491293 |
| H | 5.498019  | -1.682467 | -2.223518 |
| H | 4.112216  | -2.763092 | -1.983233 |
| C | -1.696601 | -3.306875 | 6.537377  |
| H | -1.027754 | -4.137623 | 6.782047  |
| C | 3.04568   | -2.29447  | -4.56351  |
| H | 2.170864  | -2.404986 | -3.916933 |
| C | 0.906204  | 2.818635  | 6.833128  |
| H | 1.348749  | 3.818963  | 6.807092  |
| C | 3.098471  | -1.672326 | 5.677023  |
| H | 3.308993  | -0.599469 | 5.701118  |
| C | 1.800569  | -5.5189   | -3.373084 |
| H | 2.821016  | -5.229237 | -3.106634 |
| C | -0.448762 | -6.164027 | -2.752076 |
| H | -1.195286 | -6.376651 | -1.980493 |
| C | -3.349666 | -1.655311 | 7.231622  |
| H | -3.960615 | -1.191536 | 8.011346  |
| C | -0.263281 | 1.061636  | 8.051125  |

|    |           |           |           |
|----|-----------|-----------|-----------|
| H  | -0.740809 | 0.694238  | 8.964116  |
| C  | 1.436901  | -5.549108 | -4.729195 |
| H  | 2.17246   | -5.277448 | -5.491091 |
| C  | 0.12982   | -5.904385 | -5.102778 |
| H  | -0.149962 | -5.931336 | -6.159363 |
| C  | 6.416035  | 4.927668  | -2.07007  |
| H  | 6.126191  | 4.631396  | -3.083752 |
| C  | 7.309884  | 5.996156  | -1.881252 |
| H  | 7.714289  | 6.528263  | -2.747397 |
| C  | 7.687673  | 6.379109  | -0.582362 |
| H  | 8.385197  | 7.208206  | -0.433869 |
| C  | 7.165922  | 5.685532  | 0.525002  |
| H  | 7.458962  | 5.975091  | 1.538576  |
| C  | 6.272784  | 4.619306  | 0.331666  |
| H  | 5.868913  | 4.080336  | 1.195896  |
| C  | 0.30789   | 2.346092  | 8.015189  |
| H  | 0.284295  | 2.982269  | 8.905334  |
| C  | 3.241379  | -3.837748 | 4.604461  |
| H  | 3.574509  | -4.461308 | 3.768999  |
| C  | 2.477052  | -4.406099 | 5.636538  |
| H  | 2.229261  | -5.471296 | 5.606025  |
| C  | -0.815262 | -6.208069 | -4.107421 |
| H  | -1.841479 | -6.468097 | -4.383733 |
| C  | -2.495162 | -2.727553 | 7.541129  |
| H  | -2.444365 | -3.11035  | 8.565103  |
| C  | 2.01999   | -3.603872 | 6.696854  |
| H  | 1.419841  | -4.038138 | 7.501116  |
| C  | 2.326707  | -2.232963 | 6.70805   |
| H  | 1.948666  | -1.591069 | 7.50809   |
| Ni | -2.178369 | 1.803948  | -0.892011 |
| Ni | -2.498248 | -1.081191 | -0.737589 |
| Ni | 0.358999  | 2.919051  | -0.155309 |
| S  | -2.394301 | 0.282202  | -2.486366 |
| S  | -2.231128 | -2.255957 | 1.118313  |
| S  | -0.849413 | 3.187909  | -1.99049  |
| S  | -3.698704 | 0.565772  | 0.130207  |
| S  | -1.614161 | -2.884796 | -1.663761 |
| S  | -1.61402  | 3.077905  | 0.837814  |
| C  | -3.597159 | 0.669469  | 1.965628  |
| H  | -2.54336  | 0.772722  | 2.261448  |
| H  | -3.972558 | -0.28878  | 2.355734  |
| C  | -0.678264 | -2.519022 | -3.2053   |
| H  | 0.074628  | -3.313951 | -3.308207 |

|   |           |           |           |
|---|-----------|-----------|-----------|
| H | -0.166988 | -1.553162 | -3.085473 |
| C | 1.745762  | 2.831377  | -5.212795 |
| C | 0.909138  | 3.459772  | -4.116298 |
| H | 1.577163  | 3.853013  | -3.330451 |
| H | 0.340247  | 4.313752  | -4.516105 |
| C | -0.063611 | 2.453995  | -3.482553 |
| H | -0.879063 | 2.204334  | -4.176127 |
| H | 0.456076  | 1.530702  | -3.191388 |
| C | -1.245105 | 5.858306  | 0.897513  |
| H | -1.68994  | 6.843383  | 0.656379  |
| H | -0.330555 | 5.765341  | 0.28788   |
| C | -0.952479 | -2.016361 | -5.675719 |
| C | -5.417986 | 1.882884  | 4.844402  |
| H | -6.400062 | 1.6576    | 4.415962  |
| C | -1.628806 | -2.505539 | -4.410375 |
| H | -2.030009 | -3.519568 | -4.563817 |
| H | -2.483663 | -1.847411 | -4.175623 |
| C | -4.302969 | 2.006809  | 3.991762  |
| C | 2.611744  | 1.756979  | -4.917206 |
| H | 2.660009  | 1.379337  | -3.89178  |
| C | -4.886907 | -3.109274 | 1.159647  |
| H | -4.985464 | -2.680342 | 2.170909  |
| H | -5.068603 | -2.297689 | 0.434454  |
| C | -3.45463  | -3.631178 | 0.959631  |
| H | -3.200335 | -4.381897 | 1.726321  |
| H | -3.340499 | -4.094977 | -0.032375 |
| C | -4.021817 | 2.330477  | 6.791168  |
| H | -3.909237 | 2.445761  | 7.87302   |
| C | -0.86582  | 5.833142  | 2.365376  |
| C | -2.230832 | 4.779408  | 0.442449  |
| H | -3.210324 | 4.870425  | 0.940438  |
| H | -2.391973 | 4.849003  | -0.643368 |
| C | -3.573413 | 2.467582  | -4.614196 |
| C | -4.449065 | 1.903433  | -3.512227 |
| H | -5.506207 | 1.934122  | -3.840689 |
| H | -4.372774 | 2.554438  | -2.624409 |
| C | 0.226584  | -0.254256 | -6.901029 |
| H | 0.678204  | 0.740375  | -6.912036 |
| C | -0.37919  | -0.728828 | -5.728826 |
| H | -0.420142 | -0.084961 | -4.846276 |
| C | 3.403828  | 1.16949   | -5.913186 |
| H | 4.049751  | 0.323471  | -5.667221 |
| C | -5.281859 | 2.04823   | 6.235236  |

|   |           |           |           |
|---|-----------|-----------|-----------|
| H | -6.15835  | 1.949753  | 6.882798  |
| C | -4.143354 | 0.469786  | -3.072727 |
| H | -4.816693 | 0.175774  | -2.254615 |
| H | -4.268802 | -0.255405 | -3.893709 |
| C | -2.9024   | 2.451622  | 5.949389  |
| H | -1.915563 | 2.654787  | 6.372391  |
| C | -5.888331 | -4.225923 | 0.967896  |
| C | -4.440354 | 1.840139  | 2.491293  |
| H | -5.498019 | 1.682467  | 2.223518  |
| H | -4.112216 | 2.763092  | 1.983233  |
| C | 1.696601  | 3.306875  | -6.537377 |
| H | 1.027754  | 4.137623  | -6.782047 |
| C | -3.04568  | 2.29447   | 4.56351   |
| H | -2.170864 | 2.404986  | 3.916933  |
| C | -0.906204 | -2.818635 | -6.833128 |
| H | -1.348749 | -3.818963 | -6.807092 |
| C | -3.098471 | 1.672326  | -5.677023 |
| H | -3.308993 | 0.599469  | -5.701118 |
| C | -1.800569 | 5.5189    | 3.373084  |
| H | -2.821016 | 5.229237  | 3.106634  |
| C | 0.448762  | 6.164027  | 2.752076  |
| H | 1.195286  | 6.376651  | 1.980493  |
| C | 3.349666  | 1.655311  | -7.231622 |
| H | 3.960615  | 1.191536  | -8.011346 |
| C | 0.263281  | -1.061636 | -8.051125 |
| H | 0.740809  | -0.694238 | -8.964116 |
| C | -1.436901 | 5.549108  | 4.729195  |
| H | -2.17246  | 5.277448  | 5.491091  |
| C | -0.12982  | 5.904385  | 5.102778  |
| H | 0.149962  | 5.931336  | 6.159363  |
| C | -6.416035 | -4.927668 | 2.07007   |
| H | -6.126191 | -4.631396 | 3.083752  |
| C | -7.309884 | -5.996156 | 1.881252  |
| H | -7.714289 | -6.528263 | 2.747397  |
| C | -7.687673 | -6.379109 | 0.582362  |
| H | -8.385197 | -7.208206 | 0.433869  |
| C | -7.165922 | -5.685532 | -0.525002 |
| H | -7.458962 | -5.975091 | -1.538576 |
| C | -6.272784 | -4.619306 | -0.331666 |
| H | -5.868913 | -4.080336 | -1.195896 |
| C | -0.30789  | -2.346092 | -8.015189 |
| H | -0.284295 | -2.982269 | -8.905334 |
| C | -3.241379 | 3.837748  | -4.604461 |

|   |           |          |           |
|---|-----------|----------|-----------|
| H | -3.574509 | 4.461308 | -3.768999 |
| C | -2.477052 | 4.406099 | -5.636538 |
| H | -2.229261 | 5.471296 | -5.606025 |
| C | 0.815262  | 6.208069 | 4.107421  |
| H | 1.841479  | 6.468097 | 4.383733  |
| C | 2.495162  | 2.727553 | -7.541129 |
| H | 2.444365  | 3.11035  | -8.565103 |
| C | -2.01999  | 3.603872 | -6.696854 |
| H | -1.419841 | 4.038138 | -7.501116 |
| C | -2.326707 | 2.232963 | -6.70805  |
| H | -1.948666 | 1.591069 | -7.50809  |

Figure 5B for Ni-S bond cleavage

$\text{Ni}_6(\text{SCH}_2\text{CH}_2\text{Ph})_{11}(\text{H})$ ,  $E_0 = -8813.081139$ ,  $G_{298} = -8813.244839$

|    |           |           |           |
|----|-----------|-----------|-----------|
| Ni | 0.333608  | 1.951849  | 2.086355  |
| Ni | 0.463854  | -0.924292 | 2.132062  |
| Ni | -0.206163 | 3.166847  | -0.423467 |
| S  | 2.044343  | 0.591309  | 2.477443  |
| S  | -1.160557 | -2.149962 | 1.256236  |
| S  | 1.478062  | 3.455412  | 0.937394  |
| S  | -0.791474 | 0.480259  | 3.301141  |
| S  | 1.718906  | -2.547483 | 1.309239  |
| S  | -1.395778 | 3.16517   | 1.420259  |
| C  | -2.569449 | 0.392653  | 2.831881  |
| H  | -2.662836 | 0.605183  | 1.757588  |
| H  | -2.885164 | -0.647276 | 3.004125  |
| C  | 3.428099  | -2.020904 | 0.884835  |
| H  | 3.785304  | -2.716077 | 0.11088   |
| H  | 3.397025  | -1.002823 | 0.471144  |
| C  | 5.128954  | 3.769153  | -0.952276 |
| C  | 3.647252  | 3.914403  | -0.670072 |
| H  | 3.064272  | 3.865916  | -1.608303 |
| H  | 3.46858   | 4.919247  | -0.251588 |
| C  | 3.09809   | 2.867462  | 0.308107  |
| H  | 3.753192  | 2.765657  | 1.185551  |
| H  | 2.958838  | 1.880501  | -0.153702 |
| C  | -1.833956 | 5.919217  | 1.357895  |
| H  | -1.767809 | 6.870028  | 1.920714  |
| H  | -1.216329 | 6.039326  | 0.452591  |
| C  | 5.722209  | -1.588741 | 1.862249  |
| C  | -5.865904 | 0.860464  | 4.207796  |
| H  | -5.565639 | 0.602701  | 5.228639  |

|   |           |           |           |
|---|-----------|-----------|-----------|
| C | 4.316922  | -2.084688 | 2.134775  |
| H | 4.349267  | -3.123294 | 2.500769  |
| H | 3.852821  | -1.472559 | 2.927268  |
| C | -4.886964 | 1.265838  | 3.278839  |
| C | 5.717847  | 2.513634  | -1.198277 |
| H | 5.112178  | 1.604336  | -1.172953 |
| C | -1.900488 | -3.386408 | 3.642389  |
| H | -2.928333 | -3.027694 | 3.465447  |
| H | -1.344353 | -2.580332 | 4.150884  |
| C | -1.221701 | -3.677591 | 2.293798  |
| H | -1.791224 | -4.433358 | 1.728159  |
| H | -0.19652  | -4.051877 | 2.440041  |
| C | -7.614381 | 1.1173    | 2.528511  |
| H | -8.666309 | 1.053942  | 2.235553  |
| C | -3.272804 | 5.674875  | 0.942235  |
| C | -1.205702 | 4.81887   | 2.222231  |
| H | -1.68704  | 4.735096  | 3.21062   |
| H | -0.133947 | 5.015747  | 2.376388  |
| C | 3.662181  | 2.93379   | 4.015286  |
| C | 2.525048  | 2.217783  | 4.719026  |
| H | 2.700208  | 2.231821  | 5.812177  |
| H | 1.588287  | 2.771827  | 4.537374  |
| C | 7.252649  | 0.22124   | 1.25611   |
| H | 7.404221  | 1.261366  | 0.956459  |
| C | 5.952076  | -0.244234 | 1.501915  |
| H | 5.107238  | 0.447695  | 1.423457  |
| C | 7.088768  | 2.400588  | -1.478631 |
| H | 7.512575  | 1.414341  | -1.681647 |
| C | -7.221965 | 0.790035  | 3.838632  |
| H | -7.9696   | 0.476448  | 4.573456  |
| C | 2.299343  | 0.758593  | 4.305459  |
| H | 1.417015  | 0.351523  | 4.821083  |
| H | 3.16444   | 0.120329  | 4.54995   |
| C | -6.644367 | 1.513652  | 1.591891  |
| H | -6.933493 | 1.757167  | 0.567115  |
| C | -1.930725 | -4.632627 | 4.498216  |
| C | -3.423957 | 1.356441  | 3.665252  |
| H | -3.300859 | 1.129902  | 4.737121  |
| H | -3.057279 | 2.384497  | 3.501714  |
| C | 5.956308  | 4.911086  | -0.974292 |
| H | 5.516301  | 5.893285  | -0.771812 |
| C | -5.29595  | 1.587071  | 1.96786   |
| H | -4.55268  | 1.910439  | 1.234824  |

|    |           |           |           |
|----|-----------|-----------|-----------|
| C  | 6.829647  | -2.452882 | 1.970762  |
| H  | 6.663737  | -3.496436 | 2.253287  |
| C  | 4.907858  | 2.312434  | 3.791189  |
| H  | 5.071802  | 1.277419  | 4.106272  |
| C  | -4.229043 | 5.167587  | 1.846173  |
| H  | -3.935522 | 4.917025  | 2.870314  |
| C  | -3.685079 | 5.969001  | -0.372876 |
| H  | -2.949921 | 6.339504  | -1.093664 |
| C  | 7.902099  | 3.545752  | -1.502553 |
| H  | 8.97053   | 3.459459  | -1.720476 |
| C  | 8.350126  | -0.649786 | 1.365493  |
| H  | 9.362766  | -0.287103 | 1.167642  |
| C  | -5.557984 | 4.953516  | 1.447915  |
| H  | -6.276069 | 4.531402  | 2.155342  |
| C  | -5.957167 | 5.249931  | 0.133009  |
| H  | -6.988388 | 5.066633  | -0.181031 |
| C  | -3.054082 | -5.484126 | 4.495523  |
| H  | -3.930828 | -5.214442 | 3.896992  |
| C  | -3.060825 | -6.6663   | 5.255635  |
| H  | -3.942154 | -7.314492 | 5.24765   |
| C  | -1.939839 | -7.014468 | 6.029741  |
| H  | -1.945563 | -7.932007 | 6.624848  |
| C  | -0.813263 | -6.172064 | 6.038175  |
| H  | 0.060689  | -6.434331 | 6.641877  |
| C  | -0.810288 | -4.992315 | 5.276134  |
| H  | 0.068121  | -4.337617 | 5.28555   |
| C  | 8.135115  | -1.991169 | 1.727113  |
| H  | 8.982243  | -2.677618 | 1.819251  |
| C  | 3.492366  | 4.2632    | 3.579387  |
| H  | 2.524753  | 4.752554  | 3.7251    |
| C  | 4.529514  | 4.951021  | 2.927026  |
| H  | 4.366062  | 5.974281  | 2.576287  |
| C  | -5.016028 | 5.764044  | -0.775163 |
| H  | -5.313071 | 5.995253  | -1.802664 |
| C  | 7.330711  | 4.805259  | -1.245427 |
| H  | 7.954697  | 5.704187  | -1.256296 |
| C  | 5.764002  | 4.318018  | 2.701954  |
| H  | 6.563803  | 4.837431  | 2.167513  |
| C  | 5.948764  | 2.996662  | 3.142462  |
| H  | 6.899917  | 2.487598  | 2.967311  |
| Ni | 0.064908  | -0.927022 | -2.805664 |
| Ni | -0.291293 | 1.90052   | -2.558196 |
| Ni | 0.294394  | -2.455535 | -0.375906 |

|   |           |           |           |
|---|-----------|-----------|-----------|
| S | -1.641319 | 0.360018  | -3.357535 |
| S | -1.121793 | -2.638242 | -2.065032 |
| S | 1.263377  | 0.763521  | -3.62051  |
| S | -1.788724 | 3.290327  | -1.868447 |
| S | 1.756026  | -2.144583 | -2.00758  |
| C | 2.992676  | 0.73073   | -2.985733 |
| H | 2.990152  | 0.313593  | -1.968316 |
| H | 3.353451  | 1.769539  | -2.950267 |
| C | -3.351641 | 2.467962  | -1.328566 |
| H | -3.716598 | 3.051254  | -0.469684 |
| H | -3.12574  | 1.44155   | -1.006355 |
| C | -4.806238 | -3.178069 | -0.243621 |
| C | -3.492097 | -3.464683 | -0.941873 |
| H | -2.783323 | -3.889773 | -0.2097   |
| H | -3.641915 | -4.228851 | -1.720713 |
| C | -2.845974 | -2.224558 | -1.577442 |
| H | -3.37429  | -1.924817 | -2.493721 |
| H | -2.818282 | -1.378672 | -0.876567 |
| C | 1.934417  | -4.947314 | -2.194907 |
| H | 1.903359  | -5.815532 | -2.88169  |
| H | 1.066726  | -5.043061 | -1.521303 |
| C | -5.660122 | 1.787562  | -2.145102 |
| C | 6.360787  | -0.04836  | -4.25419  |
| H | 6.203109  | 0.486202  | -5.196327 |
| C | -4.363825 | 2.495038  | -2.482032 |
| H | -4.568662 | 3.542309  | -2.755501 |
| H | -3.901726 | 2.010151  | -3.360236 |
| C | 5.248136  | -0.407595 | -3.468614 |
| C | -4.868366 | -2.25433  | 0.821709  |
| H | -3.963567 | -1.711717 | 1.111327  |
| C | 7.877921  | -1.047212 | -2.630018 |
| H | 8.892834  | -1.289488 | -2.301582 |
| C | 3.208639  | -5.013683 | -1.376972 |
| C | 1.741244  | -3.685126 | -3.038752 |
| H | 2.543032  | -3.551912 | -3.783607 |
| H | 0.781927  | -3.736097 | -3.57351  |
| C | -3.045675 | -1.757909 | -5.288971 |
| C | -1.808941 | -1.028542 | -5.781525 |
| H | -1.850291 | -0.938013 | -6.884098 |
| H | -0.919811 | -1.63761  | -5.545584 |
| C | -6.855914 | -0.266621 | -1.560313 |
| H | -6.828519 | -1.329852 | -1.311784 |
| C | -5.660377 | 0.412651  | -1.834771 |



|   |           |           |           |
|---|-----------|-----------|-----------|
| H | -4.716154 | -0.137058 | -1.823605 |
| C | -6.067157 | -2.023899 | 1.511016  |
| H | -6.096717 | -1.291119 | 2.32102   |
| C | 7.666633  | -0.371373 | -3.844611 |
| H | 8.518688  | -0.085981 | -4.468903 |
| C | -1.593039 | 0.375493  | -5.206192 |
| H | -0.618609 | 0.773912  | -5.526101 |
| H | -2.376521 | 1.083355  | -5.523164 |
| C | 6.775289  | -1.397403 | -1.830641 |
| H | 6.926633  | -1.908189 | -0.876378 |
| C | 3.836779  | -0.126723 | -3.944165 |
| H | 3.865142  | 0.362513  | -4.931553 |
| H | 3.309143  | -1.087068 | -4.083838 |
| C | -5.983278 | -3.861071 | -0.607077 |
| H | -5.952332 | -4.575946 | -1.435598 |
| C | 5.474339  | -1.085727 | -2.252168 |
| H | 4.621203  | -1.38763  | -1.638772 |
| C | -6.892193 | 2.471038  | -2.170934 |
| H | -6.906651 | 3.538628  | -2.411271 |
| C | -4.265356 | -1.088666 | -5.057623 |
| H | -4.33578  | -0.007799 | -5.210883 |
| C | 4.451769  | -4.604038 | -1.90149  |
| H | 4.509373  | -4.165201 | -2.901966 |
| C | 3.173426  | -5.540528 | -0.070266 |
| H | 2.211599  | -5.829265 | 0.364386  |
| C | -7.233095 | -2.721318 | 1.147891  |
| H | -8.169907 | -2.538111 | 1.681867  |
| C | -8.080506 | 0.422084  | -1.597073 |
| H | -9.013841 | -0.105528 | -1.380331 |
| C | 5.630598  | -4.740843 | -1.151172 |
| H | 6.58148   | -4.405196 | -1.573752 |
| C | 5.586531  | -5.295322 | 0.13941   |
| H | 6.506973  | -5.411834 | 0.717804  |
| C | -8.096083 | 1.794787  | -1.903165 |
| H | -9.044717 | 2.339516  | -1.932003 |
| C | -2.99304  | -3.14754  | -5.05973  |
| H | -2.047233 | -3.677645 | -5.208161 |
| C | -4.125322 | -3.852962 | -4.618808 |
| H | -4.058577 | -4.93064  | -4.442313 |
| C | 4.350604  | -5.687067 | 0.682374  |
| H | 4.299975  | -6.09979  | 1.694339  |
| C | -7.188623 | -3.639877 | 0.084649  |
| H | -8.092469 | -4.182109 | -0.209709 |

|   |           |           |           |
|---|-----------|-----------|-----------|
| C | -5.33266  | -3.172096 | -4.38434  |
| H | -6.212124 | -3.711201 | -4.021406 |
| C | -5.39758  | -1.785287 | -4.604588 |
| H | -6.322699 | -1.240513 | -4.399449 |
| H | 0.774237  | 2.677525  | -1.61759  |

Figure 5B for C-S bond cleavage

$\text{Ni}_6(\text{SCH}_2\text{CH}_2\text{Ph})_{11}(\text{SH})$ ,  $E_0 = -9211.151877$ ,  $G_{298} = -9211.313998$

|    |           |           |           |
|----|-----------|-----------|-----------|
| Ni | -0.358704 | -1.770989 | 2.213218  |
| Ni | -0.482295 | 1.124791  | 2.130492  |
| Ni | 0.059643  | -3.317745 | -0.255903 |
| S  | -2.053609 | -0.382942 | 2.558256  |
| S  | 1.15001   | 2.383789  | 1.328624  |
| S  | -1.509571 | -3.421469 | 1.307534  |
| S  | 0.77056   | -0.241937 | 3.345313  |
| S  | -1.755879 | 2.668922  | 1.190845  |
| S  | 1.360489  | -2.976379 | 1.495539  |
| C  | 2.555669  | -0.198777 | 2.906336  |
| H  | 2.664286  | -0.424322 | 1.835962  |
| H  | 2.900053  | 0.831985  | 3.079861  |
| C  | -3.399838 | 2.021162  | 0.674989  |
| H  | -3.737301 | 2.6507    | -0.160885 |
| H  | -3.272319 | 0.988981  | 0.319566  |
| C  | -5.236678 | -3.750348 | -0.525051 |
| C  | -3.893939 | -4.125448 | 0.069847  |
| H  | -3.241858 | -4.53708  | -0.720155 |
| H  | -4.031671 | -4.922083 | 0.817463  |
| C  | -3.192098 | -2.936491 | 0.744246  |
| H  | -3.738507 | -2.623662 | 1.646068  |
| H  | -3.111502 | -2.064149 | 0.076294  |
| C  | 1.728852  | -5.758588 | 1.614201  |
| H  | 1.670703  | -6.657932 | 2.2577    |
| H  | 0.993783  | -5.900281 | 0.804197  |
| C  | -5.703611 | 1.394237  | 1.510283  |
| C  | 5.816825  | -0.842101 | 4.303125  |
| H  | 5.532892  | -0.510564 | 5.307258  |
| C  | -4.396672 | 2.087705  | 1.841173  |
| H  | -4.582663 | 3.142004  | 2.098597  |
| H  | -3.940714 | 1.608913  | 2.725021  |
| C  | 4.813832  | -1.223777 | 3.389969  |
| C  | -5.33305  | -2.789016 | -1.55253  |
| H  | -4.435049 | -2.275845 | -1.908442 |

|   |           |           |           |
|---|-----------|-----------|-----------|
| C | 1.491842  | 3.697296  | 3.764985  |
| H | 2.519848  | 3.297509  | 3.774635  |
| H | 0.833921  | 2.929106  | 4.205845  |
| C | 1.050665  | 3.943274  | 2.313158  |
| H | 1.712349  | 4.676425  | 1.82266   |
| H | 0.018267  | 4.323669  | 2.273987  |
| C | 7.546239  | -1.309387 | 2.65009   |
| H | 8.600512  | -1.334756 | 2.359885  |
| C | 3.11751   | -5.67112  | 1.01031   |
| C | 1.28483   | -4.559373 | 2.456015  |
| H | 1.924211  | -4.408667 | 3.341575  |
| H | 0.251147  | -4.704791 | 2.80312   |
| C | -3.641922 | -2.554047 | 4.41784   |
| C | -2.471911 | -1.764175 | 4.971178  |
| H | -2.592007 | -1.664596 | 6.067523  |
| H | -1.541703 | -2.333185 | 4.803838  |
| C | -6.919836 | -0.64077  | 0.895983  |
| H | -6.90399  | -1.702364 | 0.638799  |
| C | -5.719514 | 0.01995   | 1.193314  |
| H | -4.781266 | -0.54144  | 1.192883  |
| C | -6.566965 | -2.464507 | -2.133447 |
| H | -6.61397  | -1.70593  | -2.917721 |
| C | 7.175369  | -0.888064 | 3.939175  |
| H | 7.941696  | -0.589939 | 4.661086  |
| C | -2.27373  | -0.359025 | 4.399117  |
| H | -1.383908 | 0.105851  | 4.847957  |
| H | -3.136521 | 0.299398  | 4.593362  |
| C | 6.552711  | -1.687418 | 1.730482  |
| H | 6.826026  | -2.003343 | 0.721113  |
| C | 1.428085  | 4.980183  | 4.563074  |
| C | 3.348065  | -1.188779 | 3.771714  |
| H | 3.239448  | -0.916847 | 4.834587  |
| H | 2.906386  | -2.192338 | 3.647272  |
| C | -6.420822 | -4.375521 | -0.087135 |
| H | -6.364208 | -5.120445 | 0.711869  |
| C | 5.201349  | -1.646222 | 2.101221  |
| H | 4.437605  | -1.952917 | 1.381311  |
| C | -6.927573 | 2.091994  | 1.528298  |
| H | -6.931012 | 3.157745  | 1.776287  |
| C | -4.870869 | -1.943607 | 4.094832  |
| H | -4.987456 | -0.859661 | 4.181212  |
| C | 4.201617  | -5.100915 | 1.708202  |
| H | 4.048212  | -4.658373 | 2.696765  |

|    |           |           |           |
|----|-----------|-----------|-----------|
| C  | 3.352393  | -6.198849 | -0.275628 |
| H  | 2.514348  | -6.611362 | -0.84547  |
| C  | -7.73966  | -3.101552 | -1.692206 |
| H  | -8.704459 | -2.847035 | -2.140081 |
| C  | -8.13486  | 0.065147  | 0.915247  |
| H  | -9.070411 | -0.447626 | 0.673882  |
| C  | 5.487612  | -5.071303 | 1.144496  |
| H  | 6.307392  | -4.601528 | 1.694201  |
| C  | 5.713371  | -5.620518 | -0.128874 |
| H  | 6.715475  | -5.598163 | -0.565762 |
| C  | 2.577799  | 5.772754  | 4.752876  |
| H  | 3.537121  | 5.431616  | 4.349548  |
| C  | 2.505722  | 6.988382  | 5.45491   |
| H  | 3.408334  | 7.589806  | 5.597889  |
| C  | 1.277129  | 7.429944  | 5.976649  |
| H  | 1.219837  | 8.373535  | 6.526489  |
| C  | 0.122978  | 6.647126  | 5.79141   |
| H  | -0.835639 | 6.98243   | 6.198413  |
| C  | 0.199612  | 5.433446  | 5.088681  |
| H  | -0.70074  | 4.825284  | 4.947721  |
| C  | -8.136488 | 1.434161  | 1.236564  |
| H  | -9.077796 | 1.991973  | 1.25589   |
| C  | -3.524081 | -3.949003 | 4.251981  |
| H  | -2.565883 | -4.432848 | 4.465551  |
| C  | -4.609653 | -4.719531 | 3.803868  |
| H  | -4.495296 | -5.800852 | 3.682697  |
| C  | 4.638521  | -6.181615 | -0.840451 |
| H  | 4.797279  | -6.596119 | -1.840456 |
| C  | -7.663187 | -4.05755  | -0.664395 |
| H  | -8.570761 | -4.556547 | -0.311161 |
| C  | -5.834944 | -4.100001 | 3.501318  |
| H  | -6.684002 | -4.693494 | 3.151694  |
| C  | -5.957541 | -2.707098 | 3.638206  |
| H  | -6.893394 | -2.207962 | 3.373547  |
| Ni | 0.165233  | 1.039182  | -2.825657 |
| Ni | 0.346364  | -1.904425 | -2.737354 |
| Ni | -0.218935 | 2.575372  | -0.397796 |
| S  | 1.871231  | -0.34421  | -3.126408 |
| S  | 1.309165  | 2.73647   | -1.992398 |
| S  | -0.93217  | -0.532265 | -3.923673 |
| S  | 1.671877  | -3.403788 | -1.776984 |
| S  | -1.570105 | 2.239885  | -2.117108 |
| C  | -2.722006 | -0.5742   | -3.497999 |

|   |           |           |           |
|---|-----------|-----------|-----------|
| H | -2.837372 | -0.341595 | -2.428254 |
| H | -3.075903 | -1.599968 | -3.687833 |
| C | 3.262365  | -2.675474 | -1.202196 |
| H | 3.592486  | -3.281305 | -0.34581  |
| H | 3.079418  | -1.645548 | -0.865286 |
| C | 4.950976  | 3.184284  | -0.054583 |
| C | 3.65487   | 3.52951   | -0.75933  |
| H | 2.948907  | 3.969135  | -0.033659 |
| H | 3.838845  | 4.289109  | -1.53505  |
| C | 2.994558  | 2.30107   | -1.40245  |
| H | 3.5605    | 1.965692  | -2.282952 |
| H | 2.912119  | 1.46997   | -0.688106 |
| C | -1.842701 | 5.035698  | -2.243749 |
| H | -1.791721 | 5.925621  | -2.900957 |
| H | -1.044878 | 5.151484  | -1.490817 |
| C | 5.574064  | -1.980121 | -1.985605 |
| C | -6.007166 | 0.257663  | -4.807236 |
| H | -5.781864 | -0.105858 | -5.815109 |
| C | 4.298115  | -2.72093  | -2.334459 |
| H | 4.526043  | -3.771266 | -2.573652 |
| H | 3.853012  | -2.271273 | -3.239191 |
| C | -4.948829 | 0.565265  | -3.929416 |
| C | 4.956332  | 2.266617  | 1.017232  |
| H | 4.014608  | 1.800721  | 1.320817  |
| C | -7.641354 | 0.879673  | -3.108963 |
| H | -8.680403 | 0.99151   | -2.786076 |
| C | -3.187138 | 5.017257  | -1.542952 |
| C | -1.511897 | 3.810661  | -3.099645 |
| H | -2.223264 | 3.675857  | -3.931364 |
| H | -0.503733 | 3.913872  | -3.526833 |
| C | 3.487637  | 1.799115  | -5.019403 |
| C | 2.321993  | 0.995596  | -5.562351 |
| H | 2.449228  | 0.872146  | -6.655467 |
| H | 1.390463  | 1.568187  | -5.414567 |
| C | 6.713032  | 0.094166  | -1.357351 |
| H | 6.657727  | 1.150319  | -1.084908 |
| C | 5.536493  | -0.611802 | -1.646529 |
| H | 4.576951  | -0.088272 | -1.626291 |
| C | 6.143312  | 1.946282  | 1.690474  |
| H | 6.129057  | 1.216181  | 2.503212  |
| C | -7.345861 | 0.419855  | -4.404364 |
| H | -8.155676 | 0.179226  | -5.099724 |
| C | 2.120238  | -0.398035 | -4.964044 |

|   |           |           |           |
|---|-----------|-----------|-----------|
| H | 1.238903  | -0.875618 | -5.416085 |
| H | 2.986596  | -1.058428 | -5.133072 |
| C | -6.592417 | 1.180963  | -2.22276  |
| H | -6.809095 | 1.522764  | -1.207893 |
| C | -3.502964 | 0.427034  | -4.364215 |
| H | -3.452721 | 0.112885  | -5.419355 |
| H | -3.000732 | 1.407232  | -4.294836 |
| C | 6.170414  | 3.775915  | -0.43662  |
| H | 6.181826  | 4.484018  | -1.270773 |
| C | -5.260754 | 1.03011   | -2.634523 |
| H | -4.450868 | 1.289281  | -1.947472 |
| C | 6.825764  | -2.62605  | -2.029175 |
| H | 6.869643  | -3.687221 | -2.292971 |
| C | 4.709572  | 1.19678   | -4.657693 |
| H | 4.825628  | 0.1107    | -4.710169 |
| C | -4.345865 | 4.50824   | -2.164422 |
| H | -4.283902 | 4.056184  | -3.158383 |
| C | -3.304462 | 5.554003  | -0.244688 |
| H | -2.407927 | 5.919105  | 0.265626  |
| C | 7.354324  | 2.548122  | 1.304602  |
| H | 8.282488  | 2.292898  | 1.823968  |
| C | 7.956488  | -0.558236 | -1.409371 |
| H | 8.873538  | -0.009067 | -1.177015 |
| C | -5.590481 | 4.552521  | -1.51545  |
| H | -6.47168  | 4.134087  | -2.009111 |
| C | -5.698687 | 5.113376  | -0.231522 |
| H | -6.669675 | 5.151964  | 0.269752  |
| C | 8.010839  | -1.92198  | -1.748668 |
| H | 8.974267  | -2.439244 | -1.790882 |
| C | 3.371472  | 3.199204  | -4.900747 |
| H | 2.418978  | 3.678491  | -5.147484 |
| C | 4.450085  | 3.980575  | -4.455082 |
| H | 4.336356  | 5.065368  | -4.369378 |
| C | -4.548226 | 5.609634  | 0.40581   |
| H | -4.615519 | 6.030703  | 1.413358  |
| C | 7.364816  | 3.46514   | 0.23932   |
| H | 8.303415  | 3.934814  | -0.07057  |
| C | 5.666855  | 3.3677    | -4.107269 |
| H | 6.509083  | 3.969376  | -3.754826 |
| C | 5.789183  | 1.971433  | -4.202622 |
| H | 6.717811  | 1.478105  | -3.90428  |
| S | -1.187663 | -3.37549  | -2.097169 |
| H | -2.204878 | -2.546182 | -1.734927 |

Figure 5C.

 $\text{Ni}_6(\text{SCH}_2\text{CH}_3)_{12}$ ,  $E_0 = -6751.525897$ ,  $G_{298} = -6751.636562$ 

|    |           |           |           |
|----|-----------|-----------|-----------|
| Ni | 0         | 2.910532  | 0.002502  |
| Ni | -2.520595 | 1.455266  | -0.002502 |
| Ni | 2.520595  | 1.455266  | -0.002502 |
| S  | -1.63052  | 2.820564  | 1.506264  |
| S  | -3.25794  | -0.00179  | -1.506264 |
| S  | 1.695009  | 2.932169  | 1.431073  |
| S  | -1.691828 | 2.934006  | -1.431073 |
| S  | -3.386838 | 0.001837  | 1.431073  |
| S  | 1.62742   | 2.822353  | -1.506264 |
| C  | -1.234645 | 2.169008  | -3.046923 |
| H  | -0.399873 | 1.472065  | -2.879227 |
| H  | -2.112    | 1.583972  | -3.361491 |
| C  | -2.495738 | 0.01527   | 3.046923  |
| H  | -2.42776  | -1.03706  | 3.361491  |
| H  | -1.474783 | 0.389732  | 2.879227  |
| C  | 2.373945  | 2.373943  | 4.07011   |
| H  | 3.304808  | 1.881534  | 3.749215  |
| H  | 2.578815  | 3.447126  | 4.211845  |
| C  | 1.261093  | 2.153738  | 3.046923  |
| H  | 0.31576   | 2.621032  | 3.361491  |
| H  | 1.074909  | 1.082333  | 2.879227  |
| C  | 4.033298  | 4.197447  | -1.812624 |
| H  | 4.588857  | 5.148365  | -1.748092 |
| H  | 4.547221  | 3.446093  | -1.192496 |
| C  | -3.242868 | 0.868925  | 4.07011   |
| H  | -4.274707 | 0.509756  | 4.211845  |
| H  | -3.28186  | 1.92128   | 3.749215  |
| C  | -5.651744 | 1.394215  | -1.812624 |
| H  | -5.367523 | 1.59254   | -2.858765 |
| H  | -5.258014 | 2.214963  | -1.192496 |
| C  | -5.100312 | 0.05299   | -1.328585 |
| H  | -5.482843 | -0.787884 | -1.930206 |
| H  | -5.354623 | -0.13083  | -0.27372  |
| C  | 2.596046  | 4.390505  | -1.328585 |
| H  | 2.059094  | 5.142224  | -1.930206 |
| H  | 2.564009  | 4.702654  | -0.27372  |
| C  | -1.618446 | 5.591662  | 1.812624  |
| H  | -2.164186 | 6.548249  | 1.748092  |
| H  | -0.710793 | 5.661055  | 1.192496  |

|    |           |           |           |
|----|-----------|-----------|-----------|
| C  | -2.504265 | 4.443494  | 1.328585  |
| H  | -2.790613 | 4.571824  | 0.27372   |
| H  | -3.423749 | 4.35434   | 1.930206  |
| C  | -0.868923 | 3.242868  | -4.07011  |
| H  | -1.695891 | 3.956883  | -4.211845 |
| H  | 0.022948  | 3.802814  | -3.749215 |
| Ni | 0         | -2.910532 | -0.002502 |
| Ni | 2.520595  | -1.455266 | 0.002502  |
| Ni | -2.520595 | -1.455266 | 0.002502  |
| S  | 1.63052   | -2.820564 | -1.506264 |
| S  | 3.25794   | 0.00179   | 1.506264  |
| S  | -1.695009 | -2.932169 | -1.431073 |
| S  | 1.691828  | -2.934006 | 1.431073  |
| S  | 3.386838  | -0.001837 | -1.431073 |
| S  | -1.62742  | -2.822353 | 1.506264  |
| C  | 1.234645  | -2.169008 | 3.046923  |
| H  | 0.399873  | -1.472065 | 2.879227  |
| H  | 2.112     | -1.583972 | 3.361491  |
| C  | 2.495738  | -0.01527  | -3.046923 |
| H  | 2.42776   | 1.03706   | -3.361491 |
| H  | 1.474783  | -0.389732 | -2.879227 |
| C  | -2.373945 | -2.373943 | -4.07011  |
| H  | -3.304808 | -1.881534 | -3.749215 |
| H  | -2.578815 | -3.447126 | -4.211845 |
| C  | -1.261093 | -2.153738 | -3.046923 |
| H  | -0.31576  | -2.621032 | -3.361491 |
| H  | -1.074909 | -1.082333 | -2.879227 |
| C  | -4.033298 | -4.197447 | 1.812624  |
| H  | -4.588857 | -5.148365 | 1.748092  |
| H  | -4.547221 | -3.446093 | 1.192496  |
| C  | 3.242868  | -0.868925 | -4.07011  |
| H  | 4.274707  | -0.509756 | -4.211845 |
| H  | 3.28186   | -1.92128  | -3.749215 |
| C  | 5.651744  | -1.394215 | 1.812624  |
| H  | 5.367523  | -1.59254  | 2.858765  |
| H  | 5.258014  | -2.214963 | 1.192496  |
| C  | 5.100312  | -0.05299  | 1.328585  |
| H  | 5.482843  | 0.787884  | 1.930206  |
| H  | 5.354623  | 0.13083   | 0.27372   |
| C  | -2.596046 | -4.390505 | 1.328585  |
| H  | -2.059094 | -5.142224 | 1.930206  |
| H  | -2.564009 | -4.702654 | 0.27372   |
| C  | 1.618446  | -5.591662 | -1.812624 |



|   |           |           |           |
|---|-----------|-----------|-----------|
| H | 2.164186  | -6.548249 | -1.748092 |
| H | 0.710793  | -5.661055 | -1.192496 |
| C | 2.504265  | -4.443494 | -1.328585 |
| H | 2.790613  | -4.571824 | -0.27372  |
| H | 3.423749  | -4.35434  | -1.930206 |
| C | 0.868923  | -3.242868 | 4.07011   |
| H | 1.695891  | -3.956883 | 4.211845  |
| H | -0.022948 | -3.802814 | 3.749215  |
| H | -2.079598 | -1.947553 | -5.044435 |
| H | 0.646832  | -2.774761 | 5.044435  |
| H | -2.72643  | 0.827208  | 5.044435  |
| H | -4.062942 | -3.852141 | 2.858765  |
| H | -6.753043 | 1.399884  | -1.748092 |
| H | 1.304581  | -5.444682 | -2.858765 |
| H | -0.646832 | 2.774761  | -5.044435 |
| H | -1.304581 | 5.444682  | 2.858765  |
| H | 2.72643   | -0.827208 | -5.044435 |
| H | 6.753043  | -1.399884 | 1.748092  |
| H | 2.079598  | 1.947553  | 5.044435  |
| H | 4.062942  | 3.852141  | -2.858765 |

Figure 5D. TS1

$\text{Ni}_6(\text{SCH}_2\text{CH}_3)_{12} + \text{H}_2 \rightarrow \text{Ni}_6(\text{SCH}_2\text{CH}_3)_{11}(\text{SH}) + \text{C}_2\text{H}_6$ ,  $E_0 = -6752.58524$ ,  $G_{298} = -6752.70046$

|    |           |           |           |
|----|-----------|-----------|-----------|
| Ni | -3.114014 | -0.58027  | -0.242286 |
| Ni | -0.989906 | -2.317351 | -0.016767 |
| Ni | -1.988552 | 1.970471  | -0.318779 |
| S  | -2.588875 | -1.88356  | 1.468695  |
| S  | 0.694256  | -2.557269 | -1.454801 |
| S  | -3.63799  | 1.206664  | 0.962074  |
| S  | -2.70049  | -2.385447 | -1.470911 |
| S  | 0.566871  | -2.408676 | 1.470015  |
| S  | -3.102623 | 0.890173  | -1.910011 |
| C  | -2.157322 | -1.982459 | -3.184852 |
| H  | -1.580129 | -1.047057 | -3.159815 |
| H  | -1.472975 | -2.79228  | -3.480066 |
| C  | -0.615974 | -1.569041 | 4.541352  |
| H  | 0.31537   | -1.803861 | 5.065181  |
| H  | -0.541409 | -0.876157 | 3.702054  |
| C  | -3.557998 | 2.326894  | 3.499991  |
| H  | -3.007783 | 3.203393  | 3.124815  |
| H  | -4.636871 | 2.529718  | 3.406856  |

|    |           |           |           |
|----|-----------|-----------|-----------|
| C  | -3.161417 | 1.065008  | 2.73533   |
| H  | -3.682922 | 0.17503   | 3.118352  |
| H  | -2.079467 | 0.881459  | 2.794281  |
| C  | -4.557225 | 3.179847  | -2.537712 |
| H  | -5.539014 | 3.669143  | -2.654983 |
| H  | -3.949824 | 3.770218  | -1.833448 |
| C  | -1.934747 | -1.800047 | 5.189713  |
| H  | -1.937869 | -2.677948 | 5.854877  |
| H  | -2.732359 | -1.905456 | 4.434369  |
| C  | -0.083523 | -5.12464  | -2.285085 |
| H  | -0.036398 | -4.807982 | -3.339654 |
| H  | -1.100678 | -4.931464 | -1.908433 |
| C  | 0.955776  | -4.39305  | -1.436765 |
| H  | 1.978164  | -4.556125 | -1.815537 |
| H  | 0.923237  | -4.711294 | -0.384138 |
| C  | -4.735547 | 1.754191  | -2.015095 |
| H  | -5.352559 | 1.143158  | -2.694468 |
| H  | -5.202529 | 1.746388  | -1.018652 |
| C  | -5.110483 | -2.94757  | 1.986476  |
| H  | -5.772507 | -3.829564 | 2.015383  |
| H  | -5.569316 | -2.188616 | 1.333406  |
| C  | -3.728393 | -3.339389 | 1.462005  |
| H  | -3.783972 | -3.745378 | 0.440706  |
| H  | -3.242823 | -4.089212 | 2.108426  |
| C  | -3.352526 | -1.88484  | -4.131109 |
| H  | -3.939036 | -2.817454 | -4.133457 |
| H  | -4.017296 | -1.059278 | -3.833265 |
| Ni | 3.234208  | 0.459061  | 0.201439  |
| Ni | 1.016068  | 2.399877  | -0.005175 |
| Ni | 2.138057  | -1.912941 | 0.093973  |
| S  | 2.749328  | 1.981267  | -1.331404 |
| S  | -0.73426  | 2.811379  | 1.299941  |
| S  | 3.804245  | -1.158163 | -1.224222 |
| S  | 2.489979  | 2.008707  | 1.606209  |
| S  | -0.439007 | 2.88055   | -1.609884 |
| S  | 3.437209  | -1.146034 | 1.7443    |
| C  | 1.658268  | 1.227227  | 3.057088  |
| H  | 1.34636   | 0.212132  | 2.764721  |
| H  | 0.7526    | 1.827318  | 3.233771  |
| C  | -0.095892 | 1.884735  | -3.128051 |
| H  | -1.078197 | 1.561682  | -3.505182 |
| H  | 0.469599  | 0.990435  | -2.828198 |
| C  | 3.551957  | -2.042418 | -3.834222 |

|   |           |           |           |
|---|-----------|-----------|-----------|
| H | 3.021293  | -2.947489 | -3.499418 |
| H | 4.633004  | -2.255254 | -3.82741  |
| C | 3.212005  | -0.8498   | -2.940106 |
| H | 3.701944  | 0.073749  | -3.283433 |
| H | 2.12583   | -0.677562 | -2.915165 |
| C | 4.952646  | -3.487906 | 1.779685  |
| H | 5.948856  | -3.962308 | 1.762948  |
| H | 4.338949  | -3.928745 | 0.978292  |
| C | 0.663894  | 2.714171  | -4.162018 |
| H | 0.0984    | 3.617762  | -4.440442 |
| H | 1.646062  | 3.021953  | -3.771694 |
| C | 0.233639  | 5.359372  | 1.8939    |
| H | 0.257733  | 5.073873  | 2.95801   |
| H | 1.206753  | 5.095252  | 1.450873  |
| C | -0.901027 | 4.651189  | 1.15346   |
| H | -1.88636  | 4.901116  | 1.580587  |
| H | -0.912407 | 4.913383  | 0.084281  |
| C | 5.081431  | -1.978138 | 1.572708  |
| H | 5.720682  | -1.515468 | 2.342636  |
| H | 5.503139  | -1.744803 | 0.584126  |
| C | 5.34935   | 2.984662  | -1.397551 |
| H | 6.035319  | 3.833918  | -1.238901 |
| H | 5.696779  | 2.134938  | -0.788695 |
| C | 3.924274  | 3.374448  | -1.003203 |
| H | 3.861122  | 3.644284  | 0.062177  |
| H | 3.552486  | 4.22493   | -1.598153 |
| C | 2.573877  | 1.213051  | 4.278844  |
| H | 2.892858  | 2.23182   | 4.551724  |
| H | 3.470758  | 0.603498  | 4.091046  |
| H | 3.247549  | -1.834421 | -4.874109 |
| H | 2.037292  | 0.776235  | 5.139064  |
| H | -2.215742 | -0.919353 | 5.809303  |
| H | 4.472449  | -3.723479 | 2.742974  |
| H | 0.098228  | -6.211955 | -2.24981  |
| H | 5.406823  | 2.690067  | -2.457832 |
| H | -3.006248 | -1.69186  | -5.160913 |
| H | -5.053507 | -2.532176 | 3.006288  |
| H | 0.830225  | 2.116108  | -5.074506 |
| H | 0.103396  | 6.453066  | 1.833663  |
| H | -3.320063 | 2.209283  | 4.571055  |
| H | -4.04816  | 3.189762  | -3.515066 |
| H | -0.374203 | -3.862426 | 3.272838  |
| H | -0.513237 | -3.242814 | 3.749786  |

Figure 5D. IM1

 $\text{Ni}_6(\text{SCH}_2\text{CH}_3)_{11}(\text{SH})$ ,  $E_0 = -6673.04190$ ,  $G_{298} = -6673.14839$ 

|    |           |           |           |
|----|-----------|-----------|-----------|
| Ni | -1.608362 | 2.285992  | -0.219843 |
| Ni | -2.834406 | -0.369767 | 0.10596   |
| Ni | 1.261578  | 2.50887   | -0.260798 |
| S  | -2.830975 | 1.420414  | 1.41403   |
| S  | -2.644889 | -2.157003 | -1.19424  |
| S  | -0.242885 | 3.478718  | 1.050851  |
| S  | -3.008456 | 1.140812  | -1.50467  |
| S  | -2.757715 | -1.886193 | 1.721311  |
| S  | -0.238788 | 2.946585  | -1.83844  |
| C  | -2.200687 | 0.595279  | -3.071211 |
| H  | -1.115084 | 0.544554  | -2.898451 |
| H  | -2.568181 | -0.424116 | -3.263371 |
| C  | -2.00506  | -1.214801 | 3.267117  |
| H  | -1.393624 | -2.02945  | 3.684488  |
| H  | -1.342201 | -0.378284 | 2.998604  |
| C  | 0.69332   | 3.788627  | 3.64588   |
| H  | 1.733154  | 3.801618  | 3.284979  |
| H  | 0.305984  | 4.819844  | 3.628815  |
| C  | -0.165345 | 2.862028  | 2.78687   |
| H  | -1.20683  | 2.822956  | 3.140071  |
| H  | 0.230192  | 1.835098  | 2.777807  |
| C  | 0.997413  | 5.357543  | -2.484525 |
| H  | 0.93421   | 6.455659  | -2.569102 |
| H  | 1.845605  | 5.102642  | -1.82946  |
| C  | -3.090486 | -0.770506 | 4.246997  |
| H  | -3.774603 | -1.600209 | 4.48593   |
| H  | -3.680426 | 0.058994  | 3.827831  |
| C  | -5.401804 | -2.289059 | -1.555468 |
| H  | -5.237668 | -2.110394 | -2.630473 |
| H  | -5.51642  | -1.310845 | -1.062131 |
| C  | -4.23903  | -3.063196 | -0.934334 |
| H  | -4.103089 | -4.050239 | -1.405957 |
| H  | -4.383915 | -3.212161 | 0.146338  |
| C  | -0.303185 | 4.795359  | -1.909809 |
| H  | -1.170544 | 5.039947  | -2.544772 |
| H  | -0.494596 | 5.179417  | -0.89637  |
| C  | -4.43263  | 3.691787  | 1.59839   |
| H  | -5.43166  | 4.150732  | 1.507892  |
| H  | -3.735047 | 4.234805  | 0.941181  |

|    |           |           |           |
|----|-----------|-----------|-----------|
| C  | -4.491003 | 2.215042  | 1.207025  |
| H  | -4.812298 | 2.0869    | 0.161997  |
| H  | -5.178815 | 1.646214  | 1.854237  |
| C  | -2.542846 | 1.549126  | -4.214567 |
| H  | -3.632276 | 1.617286  | -4.363614 |
| H  | -2.15619  | 2.559727  | -4.011391 |
| Ni | 1.550585  | -2.603888 | 0.350049  |
| Ni | 2.807618  | 0.077032  | 0.043501  |
| Ni | -1.263416 | -2.842139 | 0.389276  |
| S  | 2.771183  | -1.712694 | -1.260301 |
| S  | 2.64978   | 1.867435  | 1.34749   |
| S  | 0.21965   | -3.811136 | -0.948124 |
| S  | 2.919899  | -1.440568 | 1.65154   |
| S  | 2.78887   | 1.591412  | -1.576446 |
| S  | 0.218794  | -3.404197 | 1.968135  |
| C  | 2.080784  | -0.891792 | 3.201944  |
| H  | 0.996792  | -0.866776 | 3.017113  |
| H  | 2.42012   | 0.140148  | 3.3791    |
| C  | 2.0794    | 0.923406  | -3.143211 |
| H  | 1.489651  | 1.742842  | -3.58073  |
| H  | 1.392292  | 0.100446  | -2.894275 |
| C  | -0.73478  | -4.056071 | -3.544622 |
| H  | -1.774484 | -4.057616 | -3.183047 |
| H  | -0.36514  | -5.093862 | -3.545554 |
| C  | 0.140027  | -3.158077 | -2.671436 |
| H  | 1.180359  | -3.126563 | -3.029178 |
| H  | -0.24081  | -2.126097 | -2.640381 |
| C  | 3.190546  | 0.458291  | -4.083465 |
| H  | 3.897179  | 1.275231  | -4.300498 |
| H  | 3.753196  | -0.379754 | -3.643935 |
| C  | 5.411974  | 1.972718  | 1.691105  |
| H  | 5.251063  | 1.783046  | 2.764682  |
| H  | 5.518859  | 0.999319  | 1.186735  |
| C  | 4.250586  | 2.759364  | 1.083399  |
| H  | 4.126408  | 3.743963  | 1.563584  |
| H  | 4.390696  | 2.915197  | 0.003018  |
| C  | 4.367075  | -3.986817 | -1.483129 |
| H  | 5.362704  | -4.451963 | -1.38779  |
| H  | 3.657856  | -4.541716 | -0.848829 |
| C  | 4.426365  | -2.519591 | -1.058137 |
| H  | 4.739099  | -2.414534 | -0.007952 |
| H  | 5.120333  | -1.937526 | -1.686923 |
| C  | 2.436659  | -1.815374 | 4.366219  |

|   |           |           |           |
|---|-----------|-----------|-----------|
| H | 3.525295  | -1.840673 | 4.533009  |
| H | 2.090976  | -2.842715 | 4.175676  |
| H | -0.733937 | -3.688072 | -4.584835 |
| H | 1.955089  | -1.45644  | 5.292013  |
| H | -2.629233 | -0.421982 | 5.186873  |
| H | -6.341285 | -2.855415 | -1.440217 |
| H | 4.040114  | -4.089506 | -2.530578 |
| H | -2.08776  | 1.190867  | -5.153831 |
| H | -4.089973 | 3.819225  | 2.638083  |
| H | 2.756752  | 0.114764  | -5.038138 |
| H | 6.354439  | 2.534712  | 1.577812  |
| H | 0.697386  | 3.438454  | 4.692227  |
| H | 1.20548   | 4.946979  | -3.48584  |
| H | 0.328898  | -4.722571 | 1.635035  |

Figure 5D. IM2

$\text{Ni}_6(\text{SCH}_2\text{CH}_3)_{10}(\text{SH})_2$ ,  $E_0 = -6594.55549$ ,  $G_{298} = -6594.65973$

|    |           |           |           |
|----|-----------|-----------|-----------|
| Ni | 0.941489  | -2.811724 | -0.640483 |
| Ni | -1.952031 | -2.336164 | -0.762047 |
| Ni | 2.81915   | -0.657962 | -0.030296 |
| S  | -0.499643 | -2.971562 | -2.327639 |
| S  | -3.260952 | -1.562622 | 0.852796  |
| S  | 2.72265   | -2.073017 | -1.728965 |
| S  | -0.756437 | -3.725382 | 0.469475  |
| S  | -3.246424 | -1.083643 | -2.07386  |
| S  | 2.23476   | -2.462072 | 1.119159  |
| C  | -0.749468 | -3.252826 | 2.253281  |
| H  | -0.227562 | -2.289811 | 2.356231  |
| H  | -1.804223 | -3.105922 | 2.529735  |
| C  | 3.636053  | -0.889967 | -4.070493 |
| H  | 4.208738  | -0.14833  | -3.493522 |
| H  | 4.271327  | -1.775874 | -4.227919 |
| C  | 2.344735  | -1.263459 | -3.341559 |
| H  | 1.767627  | -2.000055 | -3.922768 |
| H  | 1.715443  | -0.378105 | -3.158415 |
| C  | 4.866462  | -3.048181 | 1.803598  |
| H  | 5.724412  | -3.738998 | 1.7468    |
| H  | 5.179891  | -2.06483  | 1.418275  |
| C  | -4.977238 | -3.755354 | 0.702439  |
| H  | -4.700754 | -4.009231 | 1.738566  |
| H  | -4.273116 | -4.265655 | 0.026719  |
| C  | -4.940303 | -2.244612 | 0.470011  |

|    |           |           |           |
|----|-----------|-----------|-----------|
| H  | -5.636794 | -1.710877 | 1.137575  |
| H  | -5.199165 | -1.990602 | -0.568979 |
| C  | 3.69563   | -3.591559 | 0.984294  |
| H  | 3.353226  | -4.571395 | 1.355806  |
| H  | 3.959065  | -3.69672  | -0.079077 |
| C  | -0.08663  | -4.342238 | 3.09489   |
| H  | -0.586317 | -5.314039 | 2.95529   |
| H  | 0.974933  | -4.456694 | 2.826398  |
| Ni | -1.074734 | 2.461104  | 0.193591  |
| Ni | 1.799668  | 2.020387  | 0.379048  |
| Ni | -2.98738  | 0.281604  | -0.348112 |
| S  | 0.315867  | 2.618401  | 1.914583  |
| S  | 3.108809  | 1.196677  | -1.2133   |
| S  | -2.837622 | 1.723215  | 1.31301   |
| S  | 0.619286  | 3.384907  | -0.901509 |
| S  | 3.037251  | 0.72361   | 1.684638  |
| S  | -2.340085 | 2.015843  | -1.572346 |
| C  | 0.660338  | 2.904398  | -2.681707 |
| H  | 0.178883  | 1.920702  | -2.7864   |
| H  | 1.724376  | 2.796388  | -2.940275 |
| C  | 2.128666  | 0.16422   | 3.188313  |
| H  | 2.46109   | -0.867541 | 3.377145  |
| H  | 1.052508  | 0.141864  | 2.959815  |
| C  | -3.657692 | 0.59326   | 3.713676  |
| H  | -4.292556 | -0.128384 | 3.176537  |
| H  | -4.250305 | 1.502346  | 3.903359  |
| C  | -2.397614 | 0.91216   | 2.910376  |
| H  | -1.740776 | 1.620443  | 3.437456  |
| H  | -1.817248 | 0.003034  | 2.692533  |
| C  | -4.946133 | 2.651727  | -2.332783 |
| H  | -5.781097 | 3.372329  | -2.318279 |
| H  | -5.30181  | 1.69299   | -1.923687 |
| C  | 2.432554  | 1.085178  | 4.369068  |
| H  | 3.51423   | 1.126852  | 4.57392   |
| H  | 2.077859  | 2.108103  | 4.169136  |
| C  | 4.887078  | 3.337731  | -1.050476 |
| H  | 4.639288  | 3.594635  | -2.093159 |
| H  | 4.183311  | 3.870529  | -0.391686 |
| C  | 4.801169  | 1.830404  | -0.809407 |
| H  | 5.493903  | 1.271742  | -1.460363 |
| H  | 5.027679  | 1.575797  | 0.237093  |
| C  | -3.77638  | 3.183476  | -1.505228 |
| H  | -3.400623 | 4.143693  | -1.895845 |

|   |           |           |           |
|---|-----------|-----------|-----------|
| H | -4.056874 | 3.325353  | -0.450341 |
| C | -0.787515 | 5.034215  | 2.755871  |
| H | -0.655807 | 6.111241  | 2.954526  |
| H | -1.617499 | 4.907172  | 2.042913  |
| C | 0.501245  | 4.441144  | 2.185399  |
| H | 0.772581  | 4.910588  | 1.227568  |
| H | 1.347226  | 4.557348  | 2.882666  |
| C | -0.031929 | 3.959875  | -3.542623 |
| H | 0.430744  | 4.950683  | -3.408795 |
| H | -1.099973 | 4.038666  | -3.287158 |
| H | -3.383608 | 0.150103  | 4.686236  |
| H | 0.043383  | 3.685359  | -4.60859  |
| H | -4.653117 | 2.485148  | -3.38177  |
| H | -5.991713 | -4.144484 | 0.512663  |
| H | -1.071878 | 4.543911  | 3.701075  |
| H | -0.141339 | -4.076174 | 4.164313  |
| H | 1.92302   | 0.717445  | 5.275997  |
| H | 5.90806   | 3.699256  | -0.841337 |
| H | 3.401496  | -0.45269  | -5.055743 |
| H | 4.593701  | -2.927399 | 2.864596  |
| H | -0.307232 | -1.779025 | -2.959811 |
| H | -2.406738 | -0.541001 | -3.002966 |

Figure 5D. CAT

$\text{Ni}_6(\text{SCH}_2\text{CH}_3)_{10}(\text{S})(\text{H}_2\text{S})$ ,  $E_0 = -6594.49358$ ,  $G_{298} = -6594.59806$

|    |           |           |           |
|----|-----------|-----------|-----------|
| Ni | 1.927455  | -2.206814 | -0.554586 |
| Ni | -1.322933 | -2.361632 | -0.827702 |
| Ni | 3.218686  | 0.065425  | 0.054439  |
| S  | 0.389616  | -1.978925 | -2.125169 |
| S  | -2.984557 | -2.34396  | 0.610115  |
| S  | 3.735932  | -1.3742   | -1.569754 |
| S  | 0.257022  | -3.331793 | 0.456396  |
| S  | -2.731343 | -1.460522 | -2.216539 |
| S  | 3.062786  | -1.768877 | 1.292313  |
| C  | 0.046612  | -2.849815 | 2.225329  |
| H  | 0.428536  | -1.82418  | 2.340419  |
| H  | -1.042207 | -2.83859  | 2.391499  |
| C  | 4.607783  | -0.034321 | -3.839341 |
| H  | 4.857077  | 0.851052  | -3.234159 |
| H  | 5.483909  | -0.701476 | -3.854269 |
| C  | 3.381015  | -0.741425 | -3.26341  |
| H  | 3.102704  | -1.619497 | -3.869217 |



|    |           |           |           |
|----|-----------|-----------|-----------|
| H  | 2.526755  | -0.048518 | -3.218853 |
| C  | 5.747229  | -1.820235 | 2.014587  |
| H  | 6.711436  | -2.35583  | 2.016052  |
| H  | 5.89594   | -0.830635 | 1.55474   |
| C  | -3.735077 | -4.953302 | -0.030076 |
| H  | -3.444326 | -5.253568 | 0.989715  |
| H  | -2.853403 | -5.062507 | -0.681628 |
| C  | -4.244151 | -3.513314 | -0.07035  |
| H  | -5.139967 | -3.377852 | 0.55873   |
| H  | -4.465237 | -3.180656 | -1.094968 |
| C  | 4.704615  | -2.618348 | 1.230676  |
| H  | 4.537431  | -3.616602 | 1.667047  |
| H  | 5.00049   | -2.743322 | 0.178286  |
| C  | 0.750178  | -3.824356 | 3.167484  |
| H  | 0.379404  | -4.851545 | 3.024495  |
| H  | 1.838281  | -3.821708 | 2.999844  |
| Ni | -1.951734 | 1.886697  | 0.1892    |
| Ni | 1.183422  | 2.048941  | 0.272755  |
| Ni | -3.293108 | -0.39259  | -0.393191 |
| S  | -0.432953 | 2.167581  | 1.781497  |
| S  | 2.783508  | 1.797891  | -1.257778 |
| S  | -3.509424 | 0.895813  | 1.422569  |
| S  | -0.389283 | 2.815845  | -1.078845 |
| S  | 2.832537  | 1.526561  | 1.669394  |
| S  | -3.390746 | 1.536308  | -1.487285 |
| C  | -0.354494 | 1.96854   | -2.72656  |
| H  | -0.958029 | 1.049339  | -2.640999 |
| H  | 0.702411  | 1.713131  | -2.909845 |
| C  | 2.229098  | 0.766542  | 3.236931  |
| H  | 2.956137  | -0.01601  | 3.500481  |
| H  | 1.257374  | 0.288302  | 3.044668  |
| C  | -3.826487 | -0.658152 | 3.703648  |
| H  | -4.251881 | -1.478508 | 3.105388  |
| H  | -4.647446 | 0.010425  | 4.008546  |
| C  | -2.763797 | 0.09895   | 2.907807  |
| H  | -2.314066 | 0.909897  | 3.501173  |
| H  | -1.952112 | -0.56595  | 2.577376  |
| C  | -6.175908 | 1.475351  | -1.585178 |
| H  | -7.136897 | 1.977192  | -1.379201 |
| H  | -6.187683 | 0.481727  | -1.109787 |
| C  | 2.115779  | 1.826303  | 4.332398  |
| H  | 3.073722  | 2.348353  | 4.485991  |
| H  | 1.34884   | 2.573654  | 4.078363  |

|   |           |           |           |
|---|-----------|-----------|-----------|
| C | 3.34861   | 4.523149  | -1.257416 |
| H | 3.040291  | 4.557113  | -2.314787 |
| H | 2.456377  | 4.710279  | -0.639654 |
| C | 3.970328  | 3.173086  | -0.900314 |
| H | 4.867982  | 2.962388  | -1.504568 |
| H | 4.246404  | 3.122676  | 0.164069  |
| C | -5.014609 | 2.305672  | -1.036704 |
| H | -4.990994 | 3.315984  | -1.477523 |
| H | -5.074727 | 2.404222  | 0.057313  |
| C | -1.807712 | 4.301039  | 2.934168  |
| H | -1.872044 | 5.384033  | 3.132941  |
| H | -2.717028 | 3.98839   | 2.397013  |
| C | -0.561605 | 3.989458  | 2.104706  |
| H | -0.583151 | 4.510121  | 1.134914  |
| H | 0.363907  | 4.277323  | 2.629954  |
| C | -0.901133 | 2.882715  | -3.822194 |
| H | -0.315767 | 3.813296  | -3.894305 |
| H | -1.951495 | 3.141641  | -3.620084 |
| H | -3.380021 | -1.092989 | 4.614428  |
| H | -0.859161 | 2.368023  | -4.797457 |
| H | -6.086473 | 1.328837  | -2.673534 |
| H | -4.520423 | -5.643719 | -0.382043 |
| H | -1.784813 | 3.776024  | 3.902898  |
| H | 0.564448  | -3.533698 | 4.215819  |
| H | 1.824726  | 1.351723  | 5.284808  |
| H | 4.076392  | 5.333711  | -1.083998 |
| H | 4.406744  | 0.298288  | -4.871572 |
| H | 5.438569  | -1.669369 | 3.061628  |
| H | 0.436443  | -2.607903 | -3.349113 |
| H | 0.309373  | -0.72604  | -2.670429 |

Figure 5D. IM3

$\text{Ni}_6(\text{SCH}_2\text{CH}_3)_{10}(\text{S})(\text{SC}_4\text{H}_4)$ ,  $E_0 = -6747.917757$ ,  $G_{298} = -6748.025619$

|    |           |           |           |
|----|-----------|-----------|-----------|
| Ni | -1.832997 | -1.80324  | 0.289619  |
| Ni | -2.998777 | 0.433637  | 0.089816  |
| Ni | 1.003037  | -2.558588 | 0.039357  |
| S  | -4.073764 | -1.159131 | -1.038858 |
| S  | -2.675886 | 2.334862  | 1.164757  |
| S  | -0.639426 | -2.46185  | -1.454679 |
| S  | -2.950811 | -0.871237 | 1.925171  |
| S  | -2.620274 | 1.636361  | -1.683614 |
| S  | -0.585331 | -3.207465 | 1.435667  |

|    |           |           |           |
|----|-----------|-----------|-----------|
| C  | -1.688249 | -0.182466 | 3.083481  |
| H  | -0.736172 | -0.122987 | 2.534785  |
| H  | -2.016576 | 0.843139  | 3.313758  |
| C  | 0.099667  | -1.431971 | -3.93934  |
| H  | 1.018081  | -2.039171 | -3.945794 |
| H  | -0.711874 | -2.020164 | -4.398257 |
| C  | -0.271504 | -0.997661 | -2.524446 |
| H  | -1.171179 | -0.366057 | -2.500938 |
| H  | 0.527344  | -0.41973  | -2.034862 |
| C  | 0.156406  | -5.843471 | 0.8848    |
| H  | -0.134708 | -6.847516 | 0.532069  |
| H  | 1.006452  | -5.489148 | 0.280073  |
| C  | -5.401378 | 2.948768  | 1.153057  |
| H  | -5.405582 | 2.758071  | 2.238347  |
| H  | -5.641018 | 2.004354  | 0.638863  |
| C  | -4.048396 | 3.475756  | 0.67945   |
| H  | -3.794882 | 4.439137  | 1.154563  |
| H  | -4.005217 | 3.585038  | -0.413047 |
| C  | -1.021086 | -4.876647 | 0.755963  |
| H  | -1.894974 | -5.215949 | 1.336369  |
| H  | -1.326585 | -4.747801 | -0.293476 |
| C  | -3.748971 | -2.953632 | -2.850364 |
| C  | -3.743179 | -1.585006 | -2.696191 |
| H  | -3.588779 | -0.790961 | -3.423801 |
| C  | -1.576414 | -1.035459 | 4.345552  |
| H  | -2.537029 | -1.074569 | 4.883183  |
| H  | -1.273837 | -2.06497  | 4.101557  |
| Ni | 1.795107  | 2.114666  | -0.185316 |
| Ni | 2.917825  | -0.516607 | 0.130829  |
| Ni | -1.114687 | 2.54344   | -0.378737 |
| S  | 2.708689  | 1.141594  | 1.594717  |
| S  | 2.62131   | -2.074377 | -1.422846 |
| S  | 0.454715  | 3.520416  | 0.857765  |
| S  | 3.476328  | 1.124789  | -1.238186 |
| S  | 2.606368  | -2.215021 | 1.525835  |
| S  | 0.484006  | 2.553682  | -1.931849 |
| C  | 3.1842    | 0.78052   | -3.023173 |
| H  | 2.118105  | 0.565336  | -3.176394 |
| H  | 3.756526  | -0.129139 | -3.261333 |
| C  | 1.905981  | -1.70992  | 3.151959  |
| H  | 1.253958  | -2.536056 | 3.473573  |
| H  | 1.287369  | -0.814299 | 2.999852  |
| C  | -0.536746 | 4.32444   | 3.325617  |

|   |           |           |           |
|---|-----------|-----------|-----------|
| H | -1.564986 | 4.356036  | 2.933535  |
| H | -0.069665 | 5.306508  | 3.148961  |
| C | 0.265825  | 3.204099  | 2.664307  |
| H | 1.285268  | 3.140808  | 3.073373  |
| H | -0.213242 | 2.225     | 2.802128  |
| C | -0.662695 | 4.857181  | -3.012262 |
| H | -0.560117 | 5.923228  | -3.277284 |
| H | -1.529666 | 4.738646  | -2.34288  |
| C | 3.023131  | -1.441706 | 4.158628  |
| H | 3.674406  | -2.322017 | 4.279019  |
| H | 3.644614  | -0.592842 | 3.833791  |
| C | 5.312505  | -2.752089 | -1.613934 |
| H | 5.294246  | -2.438149 | -2.670292 |
| H | 5.570644  | -1.874109 | -1.000863 |
| C | 3.963203  | -3.32502  | -1.178068 |
| H | 3.673941  | -4.196445 | -1.788001 |
| H | 3.978934  | -3.630793 | -0.121089 |
| C | 0.608788  | 4.360901  | -2.324212 |
| H | 1.492407  | 4.473369  | -2.974246 |
| H | 0.796652  | 4.902508  | -1.384493 |
| C | 4.257028  | 3.340586  | 2.337363  |
| H | 5.257513  | 3.789911  | 2.454637  |
| H | 3.673284  | 3.963521  | 1.641048  |
| C | 4.379284  | 1.914     | 1.801677  |
| H | 4.8888    | 1.892409  | 0.826088  |
| H | 4.933358  | 1.262598  | 2.497536  |
| C | 3.633032  | 1.974383  | -3.86493  |
| H | 4.698556  | 2.203296  | -3.703766 |
| H | 3.048217  | 2.871881  | -3.610965 |
| H | -0.591445 | 4.159762  | 4.415442  |
| H | 3.483196  | 1.759728  | -4.936586 |
| H | -0.870207 | 4.288871  | -3.93303  |
| H | -6.194669 | 3.681512  | 0.927279  |
| H | 3.758312  | 3.360661  | 3.320119  |
| H | -0.819914 | -0.603603 | 5.023225  |
| H | -3.601808 | -3.438792 | -3.817132 |
| H | 2.592689  | -1.19291  | 5.143551  |
| H | 6.105501  | -3.509884 | -1.495758 |
| H | 0.269564  | -0.538799 | -4.565005 |
| H | 0.494186  | -5.929743 | 1.930004  |
| C | -4.052128 | -2.843761 | -0.519732 |
| H | -4.329103 | -3.092845 | 0.503611  |
| C | -3.948081 | -3.673249 | -1.621106 |

|   |           |           |           |
|---|-----------|-----------|-----------|
| H | -3.981222 | -4.761918 | -1.553647 |
|---|-----------|-----------|-----------|

Figure 5D. TS2

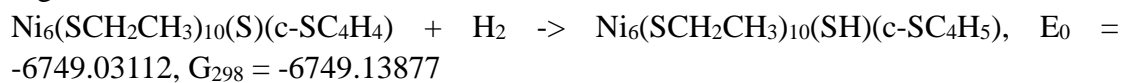

|    |           |           |           |
|----|-----------|-----------|-----------|
| Ni | -1.1509   | -1.97955  | 0.407682  |
| Ni | -3.008673 | -0.277276 | 0.276565  |
| Ni | 1.655345  | -2.362126 | -0.011398 |
| S  | -3.649856 | -2.287862 | -0.714173 |
| S  | -2.995925 | 1.685369  | 1.308178  |
| S  | -0.051485 | -2.429332 | -1.450027 |
| S  | -2.463532 | -1.48746  | 2.068098  |
| S  | -3.069053 | 1.004117  | -1.454077 |
| S  | 0.258012  | -3.337609 | 1.399415  |
| C  | -1.473775 | -0.48185  | 3.262283  |
| H  | -0.599608 | -0.086976 | 2.722242  |
| H  | -2.107081 | 0.368305  | 3.559897  |
| C  | 0.364338  | -1.235475 | -3.942197 |
| H  | 1.310519  | -1.785752 | -4.064532 |
| H  | -0.448788 | -1.847628 | -4.365169 |
| C  | 0.09915   | -0.904803 | -2.477562 |
| H  | -0.842993 | -0.358413 | -2.349252 |
| H  | 0.889991  | -0.285034 | -2.031998 |
| C  | 1.333318  | -5.796614 | 0.632125  |
| H  | 1.170892  | -6.806042 | 0.217533  |
| H  | 2.09966   | -5.285478 | 0.02741   |
| C  | -5.8014   | 1.644629  | 1.305786  |
| H  | -5.751658 | 1.275716  | 2.342794  |
| H  | -5.819049 | 0.775065  | 0.62864   |
| C  | -4.61006  | 2.538731  | 0.970858  |
| H  | -4.585668 | 3.439515  | 1.607612  |
| H  | -4.617857 | 2.844782  | -0.084004 |
| C  | 0.027869  | -5.000519 | 0.610648  |
| H  | -0.766308 | -5.495559 | 1.192622  |
| H  | -0.335627 | -4.850139 | -0.416974 |
| C  | -4.903561 | -2.42249  | -3.012503 |
| C  | -3.570553 | -2.374372 | -2.516681 |
| H  | -2.95353  | -1.060105 | -2.926678 |
| C  | -1.065993 | -1.333179 | 4.464302  |
| H  | -1.951188 | -1.711099 | 4.999924  |
| H  | -0.462355 | -2.197644 | 4.148902  |
| Ni | 1.323845  | 2.344609  | -0.227875 |

|    |           |           |           |
|----|-----------|-----------|-----------|
| Ni | 3.050135  | 0.017017  | 0.062444  |
| Ni | -1.597319 | 2.20041   | -0.34071  |
| S  | 2.452716  | 1.574099  | 1.529139  |
| S  | 3.131612  | -1.569915 | -1.49476  |
| S  | -0.231334 | 3.502156  | 0.827169  |
| S  | 3.163868  | 1.761371  | -1.306594 |
| S  | 3.178277  | -1.710826 | 1.450035  |
| S  | -0.081683 | 2.508839  | -1.94698  |
| C  | 2.970043  | 1.400318  | -3.10302  |
| H  | 2.180503  | 2.071038  | -3.474783 |
| H  | 2.626524  | 0.363287  | -3.219897 |
| C  | 2.402784  | -1.400213 | 3.090494  |
| H  | 2.021306  | -2.375298 | 3.430217  |
| H  | 1.548868  | -0.722421 | 2.953114  |
| C  | -1.296848 | 4.179811  | 3.300744  |
| H  | -2.319055 | 3.989221  | 2.939068  |
| H  | -1.044008 | 5.229237  | 3.08056   |
| C  | -0.302071 | 3.221339  | 2.647401  |
| H  | 0.720671  | 3.386223  | 3.01778   |
| H  | -0.564877 | 2.172109  | 2.837782  |
| C  | -1.553984 | 4.566637  | -3.114614 |
| H  | -1.624958 | 5.630907  | -3.396036 |
| H  | -2.417406 | 4.31103   | -2.480049 |
| C  | 3.421957  | -0.819002 | 4.069001  |
| H  | 4.296308  | -1.480446 | 4.176908  |
| H  | 3.773459  | 0.166739  | 3.726707  |
| C  | 5.899214  | -1.718516 | -1.760935 |
| H  | 5.780377  | -1.430705 | -2.818054 |
| H  | 6.01573   | -0.799029 | -1.165957 |
| C  | 4.698164  | -2.524944 | -1.266121 |
| H  | 4.565287  | -3.454249 | -1.843643 |
| H  | 4.799906  | -2.789436 | -0.202797 |
| C  | -0.247388 | 4.304728  | -2.364888 |
| H  | 0.633178  | 4.551277  | -2.981385 |
| H  | -0.191428 | 4.887776  | -1.432971 |
| C  | 3.539515  | 4.03109   | 2.311439  |
| H  | 4.43265   | 4.670222  | 2.413308  |
| H  | 2.822123  | 4.540658  | 1.648541  |
| C  | 3.930347  | 2.672122  | 1.731115  |
| H  | 4.408574  | 2.778635  | 0.745408  |
| H  | 4.622906  | 2.128436  | 2.394822  |
| C  | 4.301371  | 1.617414  | -3.82274  |
| H  | 5.072449  | 0.930599  | -3.439398 |

|   |           |           |           |
|---|-----------|-----------|-----------|
| H | 4.668197  | 2.647843  | -3.691196 |
| H | -1.290603 | 4.045336  | 4.395878  |
| H | 4.181465  | 1.429346  | -4.903347 |
| H | -1.618667 | 3.961266  | -4.032824 |
| H | -6.743457 | 2.205258  | 1.181282  |
| H | 3.080983  | 3.929315  | 3.308519  |
| H | -0.467659 | -0.729574 | 5.168265  |
| H | -5.1232   | -2.544203 | -4.074155 |
| H | 2.960503  | -0.691436 | 5.062969  |
| H | 6.822759  | -2.315008 | -1.669676 |
| H | 0.424256  | -0.301367 | -4.526224 |
| H | 1.722601  | -5.903142 | 1.657391  |
| C | -5.379242 | -2.03638  | -0.732582 |
| H | -5.904887 | -1.866176 | 0.20437   |
| C | -5.880254 | -2.152956 | -2.028202 |
| H | -6.947626 | -2.072621 | -2.249088 |
| H | -2.732516 | -2.972223 | -2.888733 |
| H | -2.732233 | -0.178474 | -2.70114  |

Figure 5D. IM4

$\text{Ni}_6(\text{SCH}_2\text{CH}_3)_{10}(\text{SH})(\text{c-SC}_4\text{H}_5)$ ,  $E_0 = -6749.080378$ ,  $G_{298} = -6749.18808$

|    |           |           |           |
|----|-----------|-----------|-----------|
| Ni | 0.718892  | 2.565467  | -0.065816 |
| Ni | 3.010127  | 0.722056  | -0.160745 |
| Ni | -2.08678  | 1.909497  | 0.322829  |
| S  | 1.895747  | 1.777681  | -1.732906 |
| S  | 3.332127  | -0.696684 | 1.536718  |
| S  | -1.100523 | 3.331775  | -1.069483 |
| S  | 2.733549  | 2.626032  | 0.932737  |
| S  | 3.789852  | -0.934417 | -1.444383 |
| S  | -0.581926 | 2.676579  | 1.764138  |
| C  | 2.679313  | 2.393053  | 2.760532  |
| H  | 1.803048  | 1.773862  | 3.001079  |
| H  | 3.584951  | 1.827229  | 3.025838  |
| C  | -2.525733 | 3.508705  | -3.446341 |
| H  | -3.432048 | 3.126192  | -2.952709 |
| H  | -2.511363 | 4.60541   | -3.343198 |
| C  | -1.272057 | 2.87544   | -2.84344  |
| H  | -0.362563 | 3.234983  | -3.349171 |
| H  | -1.290668 | 1.779445  | -2.930877 |
| C  | -2.406341 | 4.534092  | 2.770412  |
| H  | -2.685066 | 5.590649  | 2.922438  |
| H  | -3.215608 | 4.033066  | 2.215818  |

|    |           |           |           |
|----|-----------|-----------|-----------|
| C  | 5.989122  | 0.049686  | 1.950277  |
| H  | 5.718108  | 0.413349  | 2.954773  |
| H  | 5.857369  | 0.878065  | 1.236468  |
| C  | 5.129159  | -1.146099 | 1.538923  |
| H  | 5.230252  | -1.982454 | 2.250366  |
| H  | 5.405603  | -1.509712 | 0.538323  |
| C  | -1.092075 | 4.441349  | 1.994746  |
| H  | -0.266939 | 4.932432  | 2.536133  |
| H  | -1.177372 | 4.907025  | 1.000685  |
| C  | 2.477142  | 2.650092  | -4.21221  |
| C  | 2.685768  | 3.104715  | -2.794828 |
| H  | 2.159317  | 4.035128  | -2.527468 |
| C  | 2.625393  | 3.742252  | 3.474935  |
| H  | 3.495232  | 4.367642  | 3.218148  |
| H  | 1.715297  | 4.297223  | 3.200545  |
| Ni | -0.664229 | -2.617873 | -0.080182 |
| Ni | -2.873869 | -0.846572 | 0.163217  |
| Ni | 2.305181  | -1.865657 | -0.049861 |
| S  | -2.202376 | -2.471569 | 1.515321  |
| S  | -3.326657 | 0.855151  | -1.186189 |
| S  | 1.037906  | -3.108818 | 1.248331  |
| S  | -2.423701 | -2.338328 | -1.408593 |
| S  | -3.239334 | 0.663987  | 1.742976  |
| S  | 0.919966  | -2.57749  | -1.631904 |
| C  | -2.003473 | -1.566705 | -3.028494 |
| H  | -1.135841 | -0.906313 | -2.889485 |
| H  | -2.865649 | -0.937246 | -3.296091 |
| C  | -2.325738 | 0.292483  | 3.3012    |
| H  | -2.010223 | 1.267516  | 3.702028  |
| H  | -1.418421 | -0.276708 | 3.052567  |
| C  | 1.898338  | -2.971332 | 3.890354  |
| H  | 2.913018  | -2.698613 | 3.561328  |
| H  | 1.832607  | -4.069893 | 3.941366  |
| C  | 0.847106  | -2.397983 | 2.942049  |
| H  | -0.174995 | -2.65263  | 3.261305  |
| H  | 0.927478  | -1.303045 | 2.863418  |
| C  | 2.640079  | -4.5282   | -2.651218 |
| H  | 2.858394  | -5.598012 | -2.807757 |
| H  | 3.478639  | -4.076142 | -2.099053 |
| C  | -3.219484 | -0.465204 | 4.28126   |
| H  | -4.138403 | 0.100436  | 4.503525  |
| H  | -3.504547 | -1.445426 | 3.869708  |
| C  | -6.011919 | 0.150664  | -1.401872 |



|   |           |           |           |
|---|-----------|-----------|-----------|
| H | -5.85855  | 0.010387  | -2.484159 |
| H | -5.803314 | -0.808171 | -0.901137 |
| C | -5.103117 | 1.247817  | -0.846692 |
| H | -5.2935   | 2.220611  | -1.329524 |
| H | -5.234341 | 1.369057  | 0.239354  |
| C | 1.334454  | -4.367271 | -1.87333  |
| H | 0.478178  | -4.806029 | -2.412135 |
| H | 1.392348  | -4.838206 | -0.879773 |
| C | -2.524267 | -5.238766 | 1.537065  |
| H | -3.193068 | -6.109793 | 1.4318    |
| H | -1.684909 | -5.350234 | 0.832619  |
| C | -3.289292 | -3.946834 | 1.248302  |
| H | -3.665339 | -3.923779 | 0.214364  |
| H | -4.142673 | -3.815084 | 1.933518  |
| C | -1.733547 | -2.637394 | -4.084618 |
| H | -2.592525 | -3.319259 | -4.189066 |
| H | -0.846261 | -3.234131 | -3.823456 |
| H | 1.748628  | -2.568095 | 4.906498  |
| H | -1.548602 | -2.163437 | -5.063674 |
| H | 2.581187  | -4.041225 | -3.637827 |
| H | 7.05508   | -0.233845 | 1.966779  |
| H | -2.11135  | -5.243238 | 2.558879  |
| H | 2.618517  | 3.592934  | 4.568001  |
| H | 2.925565  | 3.185707  | -5.049357 |
| H | -2.680697 | -0.634492 | 5.229214  |
| H | -7.070915 | 0.411275  | -1.235862 |
| H | -2.591075 | 3.263835  | -4.520137 |
| H | -2.325036 | 4.056187  | 3.760258  |
| C | 1.321314  | 0.894942  | -3.090751 |
| H | 0.78852   | -0.039794 | -2.932418 |
| C | 1.740516  | 1.494368  | -4.315838 |
| H | 1.496489  | 1.02715   | -5.273981 |
| H | 3.738596  | 3.194157  | -2.483029 |
| H | 3.050366  | -0.735265 | -2.58091  |

Figure 5D. TS3

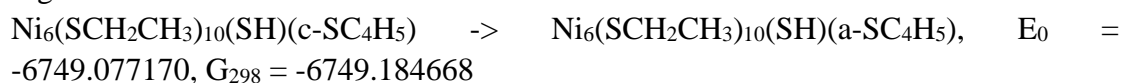

|    |           |           |           |
|----|-----------|-----------|-----------|
| Ni | 1.1798    | -2.587654 | -0.24599  |
| Ni | -1.890503 | -2.201299 | -0.472554 |
| Ni | 2.939317  | -0.515434 | 0.280241  |
| S  | -0.231247 | -2.177306 | -1.908091 |
| S  | -3.199549 | -1.563767 | 1.20011   |

|    |           |           |           |
|----|-----------|-----------|-----------|
| S  | 3.125445  | -2.152577 | -1.213041 |
| S  | -0.599637 | -3.62821  | 0.599398  |
| S  | -3.481866 | -1.284751 | -1.784841 |
| S  | 2.330418  | -2.163762 | 1.648048  |
| C  | -0.709967 | -3.496135 | 2.436162  |
| H  | -0.317736 | -2.512476 | 2.733836  |
| H  | -1.780145 | -3.532841 | 2.688346  |
| C  | 4.394915  | -1.205647 | -3.497364 |
| H  | 4.792266  | -0.343757 | -2.939371 |
| H  | 5.117422  | -2.032908 | -3.411681 |
| C  | 3.018736  | -1.603534 | -2.964661 |
| H  | 2.601479  | -2.457874 | -3.522015 |
| H  | 2.303601  | -0.772558 | -3.032678 |
| C  | 4.952765  | -2.574812 | 2.51827   |
| H  | 5.821167  | -3.250853 | 2.597997  |
| H  | 5.267434  | -1.659182 | 1.99306   |
| C  | -4.645903 | -3.946061 | 1.32352   |
| H  | -4.329026 | -4.075219 | 2.371232  |
| H  | -3.895872 | -4.425458 | 0.674991  |
| C  | -4.79913  | -2.46756  | 0.963619  |
| H  | -5.527116 | -1.962508 | 1.61956   |
| H  | -5.129788 | -2.341011 | -0.078037 |
| C  | 3.817559  | -3.258629 | 1.755449  |
| H  | 3.480512  | -4.175614 | 2.267176  |
| H  | 4.125176  | -3.526447 | 0.733114  |
| C  | -0.505013 | -1.667699 | -4.628797 |
| C  | -0.83948  | -2.80021  | -3.773191 |
| H  | -0.43621  | -3.787703 | -4.044694 |
| C  | 0.070453  | -4.631095 | 3.097651  |
| H  | -0.308979 | -5.615733 | 2.781281  |
| H  | 1.138502  | -4.57391  | 2.837335  |
| Ni | -1.247487 | 2.404536  | 0.185995  |
| Ni | 1.676377  | 2.099075  | 0.385759  |
| Ni | -3.151084 | 0.191429  | -0.142185 |
| S  | 0.156388  | 2.689057  | 1.879628  |
| S  | 3.025141  | 1.195651  | -1.131457 |
| S  | -2.984494 | 1.754837  | 1.396754  |
| S  | 0.413039  | 3.330864  | -0.957732 |
| S  | 3.047385  | 1.081851  | 1.801131  |
| S  | -2.570518 | 1.852577  | -1.510042 |
| C  | 0.498536  | 2.891931  | -2.748271 |
| H  | -0.509308 | 2.562965  | -3.044177 |
| H  | 1.198027  | 2.04938   | -2.852585 |

|   |           |           |           |
|---|-----------|-----------|-----------|
| C | 2.246186  | 0.636338  | 3.400176  |
| H | 2.709462  | -0.31253  | 3.709817  |
| H | 1.178141  | 0.449275  | 3.215874  |
| C | -3.753831 | 0.740234  | 3.862717  |
| H | -4.335316 | -0.054299 | 3.369867  |
| H | -4.405184 | 1.619872  | 3.987877  |
| C | -2.508695 | 1.08581   | 3.047813  |
| H | -1.907278 | 1.870932  | 3.530379  |
| H | -1.863615 | 0.207721  | 2.896018  |
| C | -5.19822  | 2.47642   | -2.190809 |
| H | -6.024463 | 3.20721   | -2.18721  |
| H | -5.544162 | 1.551746  | -1.702602 |
| C | 2.458397  | 1.738483  | 4.436706  |
| H | 3.530159  | 1.946153  | 4.585134  |
| H | 1.964913  | 2.672273  | 4.126188  |
| C | 4.549904  | 3.512246  | -1.415884 |
| H | 4.303599  | 3.529443  | -2.489973 |
| H | 3.772104  | 4.076195  | -0.876742 |
| C | 4.633073  | 2.080207  | -0.887326 |
| H | 5.390686  | 1.489466  | -1.428182 |
| H | 4.87849   | 2.058303  | 0.185614  |
| C | -3.9856   | 3.045948  | -1.454189 |
| H | -3.616349 | 3.971791  | -1.924913 |
| H | -4.216939 | 3.262187  | -0.399882 |
| C | -1.024185 | 5.079177  | 2.688451  |
| H | -0.941859 | 6.170198  | 2.828073  |
| H | -1.881627 | 4.873608  | 2.02826   |
| C | 0.264158  | 4.526727  | 2.078069  |
| H | 0.467638  | 4.970836  | 1.091651  |
| H | 1.135693  | 4.709508  | 2.728303  |
| C | 0.969111  | 4.097414  | -3.562116 |
| H | 1.973706  | 4.42198   | -3.247484 |
| H | 0.284273  | 4.952614  | -3.447685 |
| H | -3.462032 | 0.380317  | 4.86395   |
| H | 1.014582  | 3.835354  | -4.633313 |
| H | -4.955288 | 2.235518  | -3.238131 |
| H | -5.607804 | -4.469591 | 1.192438  |
| H | -1.231908 | 4.624043  | 3.670522  |
| H | -0.018656 | -4.56193  | 4.195066  |
| H | -0.180754 | -1.807064 | -5.663402 |
| H | 2.029038  | 1.432136  | 5.405841  |
| H | 5.516339  | 4.025847  | -1.277981 |
| H | 4.32135   | -0.919413 | -4.560309 |

|   |           |           |           |
|---|-----------|-----------|-----------|
| H | 4.642298  | -2.29474  | 3.538054  |
| C | -0.097346 | -0.565442 | -2.544968 |
| H | 0.200047  | 0.224581  | -1.855725 |
| C | -0.257059 | -0.476542 | -3.937429 |
| H | -0.050165 | 0.467838  | -4.449968 |
| H | -1.886853 | -2.88195  | -3.449638 |
| H | -2.757711 | -0.696823 | -2.783329 |

Figure 5D. IM5

$\text{Ni}_6(\text{SCH}_2\text{CH}_3)_{10}(\text{SH})(\text{a-SC}_4\text{H}_5)$ ,  $E_0 = -6749.12487$ ,  $G_{298} = -6749.233615$

|    |           |           |           |
|----|-----------|-----------|-----------|
| Ni | -0.727867 | -2.659853 | 0.122786  |
| Ni | 2.273289  | -2.002698 | 0.269436  |
| Ni | -2.902785 | -0.834528 | -0.209615 |
| S  | 0.727672  | -2.546968 | 1.806711  |
| S  | 3.555493  | -1.129351 | -1.317686 |
| S  | -2.638272 | -2.485957 | 1.232136  |
| S  | 1.057606  | -3.314299 | -1.011892 |
| S  | 3.687093  | -0.922462 | 1.633081  |
| S  | -2.059147 | -2.323785 | -1.617883 |
| C  | 1.023044  | -2.769197 | -2.775812 |
| H  | 0.437065  | -1.839983 | -2.839001 |
| H  | 2.06622   | -2.542515 | -3.042287 |
| C  | -3.946001 | -2.020978 | 3.623725  |
| H  | -4.61189  | -1.289015 | 3.139771  |
| H  | -4.403819 | -3.018417 | 3.527639  |
| C  | -2.551843 | -1.980535 | 2.998859  |
| H  | -1.86452  | -2.689483 | 3.487316  |
| H  | -2.114766 | -0.976462 | 3.068302  |
| C  | -4.535571 | -3.259546 | -2.477879 |
| H  | -5.259877 | -4.08913  | -2.538328 |
| H  | -5.020715 | -2.406594 | -1.977053 |
| C  | 5.289632  | -3.306633 | -1.307806 |
| H  | 4.944548  | -3.540371 | -2.328032 |
| H  | 4.634088  | -3.834025 | -0.597362 |
| C  | 5.258259  | -1.801791 | -1.039673 |
| H  | 5.911048  | -1.248067 | -1.734307 |
| H  | 5.571311  | -1.569422 | -0.011096 |
| C  | -3.294924 | -3.697981 | -1.699656 |
| H  | -2.779276 | -4.539804 | -2.190782 |
| H  | -3.545752 | -3.997175 | -0.670579 |
| C  | 1.059967  | -1.570468 | 4.843862  |
| C  | 1.250022  | -1.222011 | 6.142104  |

|    |           |           |           |
|----|-----------|-----------|-----------|
| H  | 1.565915  | -1.956879 | 6.886961  |
| C  | 0.435328  | -3.862465 | -3.666488 |
| H  | 1.000125  | -4.803164 | -3.568903 |
| H  | -0.615363 | -4.06106  | -3.405647 |
| Ni | 0.866026  | 2.427742  | -0.182671 |
| Ni | -2.069376 | 1.857293  | -0.309752 |
| Ni | 3.156957  | 0.559476  | 0.064247  |
| S  | -0.623803 | 2.570932  | -1.82346  |
| S  | -3.26384  | 0.803528  | 1.243079  |
| S  | 2.649068  | 2.074781  | -1.450045 |
| S  | -0.849485 | 3.126733  | 1.031446  |
| S  | -3.385603 | 0.732753  | -1.695745 |
| S  | 2.311028  | 2.063374  | 1.468204  |
| C  | -0.822614 | 2.56196   | 2.785587  |
| H  | 0.230983  | 2.605206  | 3.102691  |
| H  | -1.159154 | 1.516176  | 2.815505  |
| C  | -2.643391 | 0.4368    | -3.356228 |
| H  | -3.042897 | -0.532272 | -3.691936 |
| H  | -1.553228 | 0.33882   | -3.251609 |
| C  | 3.472827  | 1.295014  | -3.985913 |
| H  | 4.257396  | 0.657679  | -3.549522 |
| H  | 3.888444  | 2.304735  | -4.132465 |
| C  | 2.238335  | 1.329939  | -3.086793 |
| H  | 1.438701  | 1.956445  | -3.510359 |
| H  | 1.830667  | 0.321707  | -2.92031  |
| C  | 4.797161  | 3.162214  | 2.086542  |
| H  | 5.467565  | 4.038183  | 2.077137  |
| H  | 5.298588  | 2.330635  | 1.566787  |
| C  | -3.014916 | 1.564053  | -4.318833 |
| H  | -4.107432 | 1.685695  | -4.391801 |
| H  | -2.582164 | 2.520608  | -3.98785  |
| C  | -5.209613 | 2.794231  | 1.50605   |
| H  | -4.952603 | 2.904138  | 2.571886  |
| H  | -4.573032 | 3.480605  | 0.925409  |
| C  | -5.018333 | 1.354831  | 1.029737  |
| H  | -5.627121 | 0.64743   | 1.616581  |
| H  | -5.285258 | 1.243291  | -0.032252 |
| C  | 3.475813  | 3.501513  | 1.396473  |
| H  | 2.953223  | 4.334067  | 1.895426  |
| H  | 3.629319  | 3.772612  | 0.340699  |
| C  | 0.299398  | 5.055024  | -2.690449 |
| H  | 0.118206  | 6.13609   | -2.812721 |
| H  | 1.212392  | 4.918246  | -2.089599 |

|   |           |           |           |
|---|-----------|-----------|-----------|
| C | -0.897433 | 4.394472  | -2.005877 |
| H | -1.078905 | 4.818864  | -1.006433 |
| H | -1.819809 | 4.502964  | -2.600176 |
| C | -1.720076 | 3.448168  | 3.647223  |
| H | -2.766322 | 3.394037  | 3.309253  |
| H | -1.400965 | 4.501764  | 3.607186  |
| H | 3.20789   | 0.883479  | -4.974783 |
| H | -1.682658 | 3.115767  | 4.698883  |
| H | 4.638521  | 2.86069   | 3.134256  |
| H | 6.316664  | -3.692813 | -1.194843 |
| H | 0.47958   | 4.624135  | -3.688783 |
| H | 0.469745  | -3.546163 | -4.722983 |
| H | 1.228148  | -2.607928 | 4.531547  |
| H | -2.624311 | 1.343723  | -5.326845 |
| H | -6.261933 | 3.098814  | 1.37675   |
| H | -3.884068 | -1.770957 | 4.696374  |
| H | -4.279918 | -2.954226 | -3.505644 |
| C | 0.439383  | -0.933817 | 2.498339  |
| H | 0.124925  | -0.165706 | 1.783456  |
| C | 0.639181  | -0.635493 | 3.814321  |
| H | 0.472937  | 0.403365  | 4.123698  |
| H | 1.096666  | -0.192879 | 6.483085  |
| H | 2.885258  | -0.535829 | 2.667983  |
